# Supplementary material for: Accurate, multi-kb reads resolve complex populations and detect rare microorganisms
Source: HighWire-hosted journal article supplement (doi:10.1101/gr.183012.114), 2015-02-09
Supplement: Supplemental_Information.pdf [file Supplemental_Information.pdf]

## Supplementary Information – Sharon *et al.*, 2014

### Table of contents

|                                                                        |    |
|------------------------------------------------------------------------|----|
| Assembly of synthetic long-reads with Lola .....                       | 9  |
| Reconstruction of syntenic regions.....                                | 12 |
| Strain variation for the Deltaproteobacteria clade .....               | 16 |
| Recovery of 16S rRNA genes and tree construction .....                 | 19 |
| Using the <i>rpS3</i> gene for community structure inference.....      | 20 |
| Estimating a lower bound for the number of species in the samples..... | 25 |
| Internal controls on contamination .....                               | 26 |

### Table of figures

|                 |    |
|-----------------|----|
| Figure S1.....  | 2  |
| Figure S2.....  | 2  |
| Figure S3.....  | 3  |
| Figure S4.....  | 4  |
| Figure S5.....  | 5  |
| Figure S6.....  | 6  |
| Figure S7.....  | 7  |
| Figure S8.....  | 7  |
| Figure S9.....  | 8  |
| Figure S10..... | 9  |
| Figure S11..... | 16 |
| Figure S12..... | 17 |
| Figure S13..... | 18 |
| Figure S14..... | 19 |
| Figure S15..... | 21 |
| Figure S16..... | 25 |
| Figure S17..... | 27 |
| Figure S18..... | 31 |
| Figure S19..... | 35 |

### Table of tables

|                |    |
|----------------|----|
| Table S1.....  | 2  |
| Table S2.....  | 2  |
| Table S3.....  | 14 |
| Table S4.....  | 15 |
| Table S5.....  | 23 |
| Table S6.....  | 24 |
| Table S7.....  | 28 |
| Table S8.....  | 29 |
| Table S9.....  | 30 |
| Table S10..... | 32 |
| Table S11..... | 32 |
| Table S12..... | 33 |
| Table S13..... | 33 |
| Table S14..... | 33 |
| Table S15..... | 33 |
| Table S16..... | 34 |
| Table S17..... | 34 |
| Table S18..... | 34 |
| Table S19..... | 36 |

**Table S1:** sequencing statistics for the short- and long-read data. Read length for the short-read data is 150 bp, numbers in the table are for trimmed reads.

| Sample     | Short reads |     |          | Synthetic long reads |       |         |
|------------|-------------|-----|----------|----------------------|-------|---------|
|            | # reads     | N50 | Amount   | # reads              | N50   | Amount  |
| <b>4 m</b> | 263,119,764 | 135 | 33.5 gbp | 70,342               | 8,229 | 490 mbp |
| <b>5 m</b> | 497,853,726 | 125 | 49.6 gbp | 86,934               | 7,962 | 534 mbp |
| <b>6 m</b> | 191,665,440 | 133 | 23.8 gbp | 67,592               | 8,222 | 450 mbp |

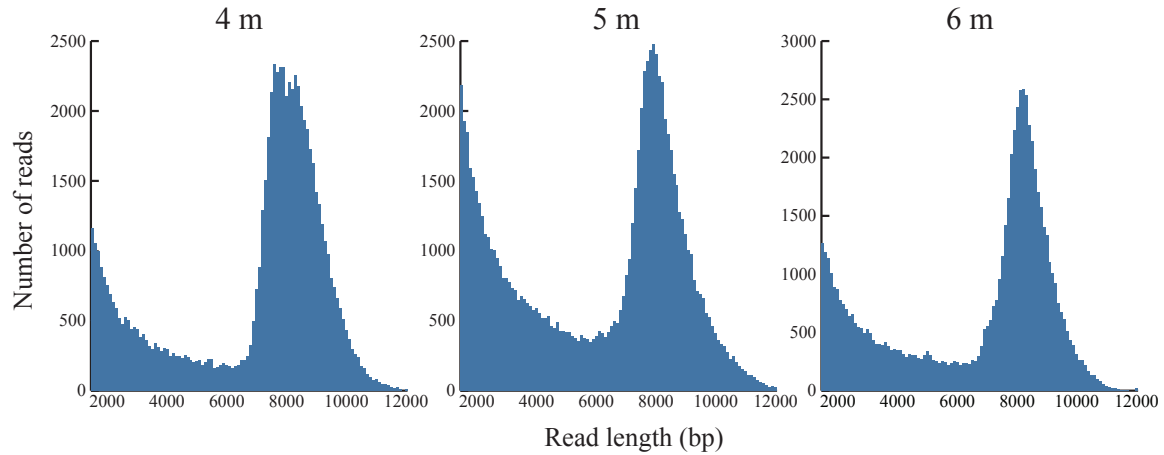

**Figure S1:** distribution of synthetic long-read lengths for the three samples.

**Table S2:** statistics for short- and long-read assemblies. Short-read assemblies refer only to scaffolds and contigs longer than 1,500 (400) bp. For the long-read data, overall N50 refers to both assembled and unassembled data.

| Sample     | Short reads    |                  |                     | Long reads        |             |         |
|------------|----------------|------------------|---------------------|-------------------|-------------|---------|
|            | % mapped reads | Assembly N50     | Assembly size (mbp) | % assembled reads | Overall N50 | Amount  |
| <b>4 m</b> | 27<br>(35)     | 4,262<br>(1,752) | 931<br>(1,694)      | 11                | 8,324       | 470 mbp |
| <b>5 m</b> | 33<br>(47)     | 5,128<br>(2,590) | 1,456<br>(2,207)    | 14                | 8,071       | 505 mbp |
| <b>6 m</b> | 18<br>(25)     | 3,747<br>(1,474) | 366<br>(957)        | 6                 | 8,264       | 440 mbp |

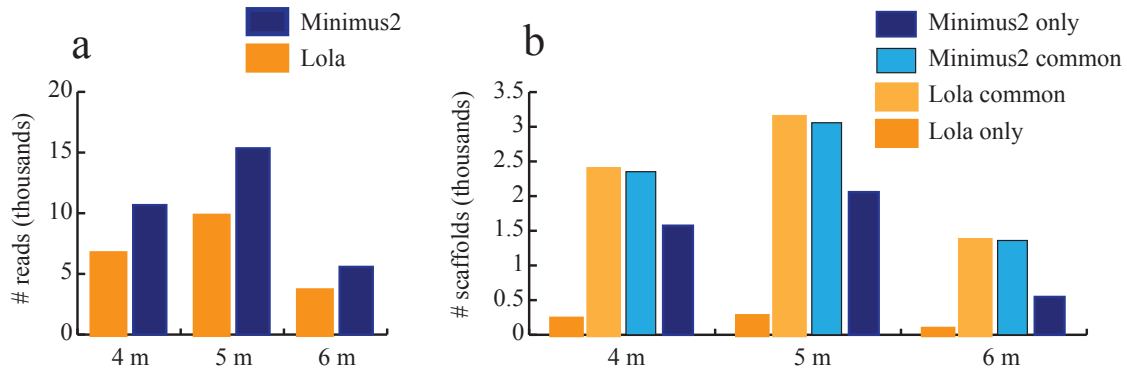

**Figure S2:** (a) Number of reads assembled by the assembler Lola compared to the number of reads assembled by Minimus 2. (b) Number of assembled contigs that are common to both assemblies and number of reads that were assembled by each of the assemblers alone. Common contigs for each assembler are those that have identical or containing contigs in the other assembler's assembly.

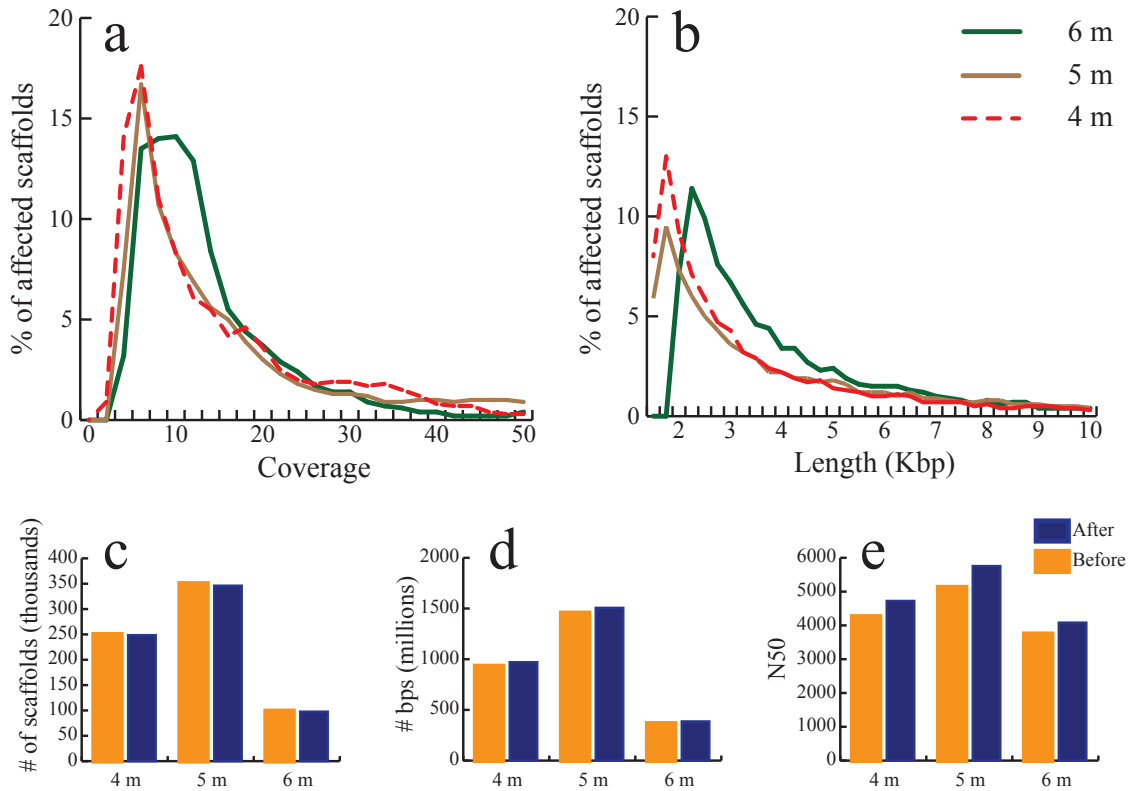

**Figure S3:** Short-read assemblies before and after scaffolding by Minimus 2 using the synthetic long-reads. synthetic long-reads that did not contribute to the scaffolding or extending of short-read sequences are not included. (a, b) Distribution of coverage values (a) and lengths (b) for assembled scaffolds and contigs affected by long-read data. (c, d, e) change in number of scaffolds (c), total number of bps (d) and N50 (e) for short-read assemblies as a result of scaffolding with long reads.

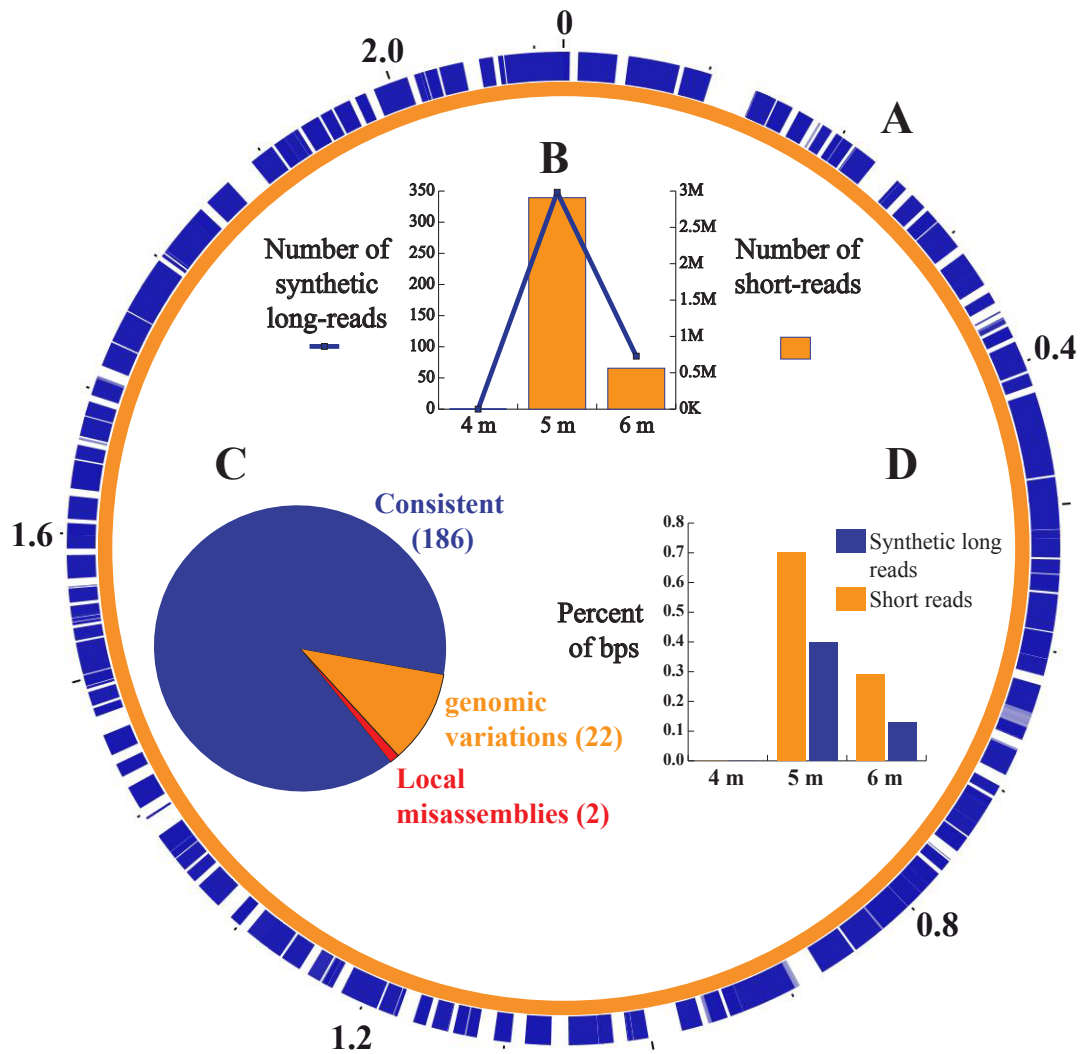

**Figure S4:** comparison of long- and short-read RBG-1 assemblies. (a) 210 synthetic long-reads and contigs (440 reads) could be aligned to the assembled RBG-1 genome [1] covering 75% of its length. (b) The 5 m sample contributed the majority of long- and short-reads, no reads were found in the 4 m sample. (c) 89% of the aligned long-read sequences were consistent with the assembled short-read genome, 1 % revealed local mis-assemblies in the genome. (d) RBG-1 associated reads account for less than 1 % of both the long- and short-reads in all cases.

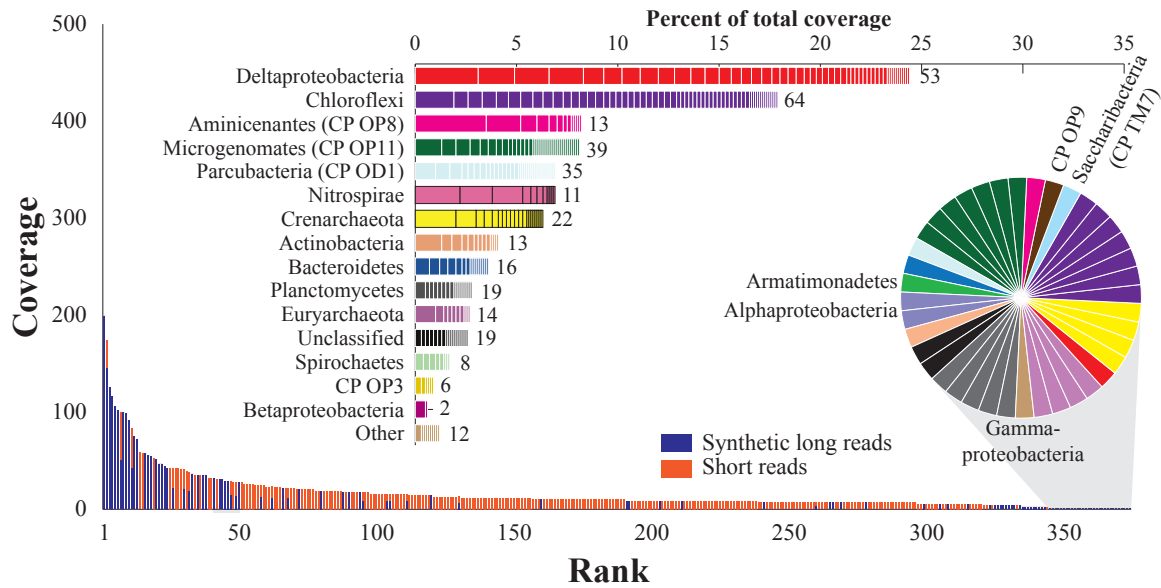

**Figure S5:** Community composition for the 4 m sample, based on species-level clustering (99% identity) of *rpS3* genes recovered from the long- and short-assemblies. Colors in rank abundance curve (bottom) indicate origin of genes (short-/long-read sequences), coverages are normalized by number of bps in the 5 m sample. Stacked bar graph (top) shows abundance of phyla and Proteobacteria classes in the community, stacked boxes indicate abundance of individual species (number of species indicated). Phylum/class affiliations for *rpS3* genes recovered from long-read sequences with zero coverage by the short-read data are provided in the pie chart (phylum colors are identical to stacked bar graph).

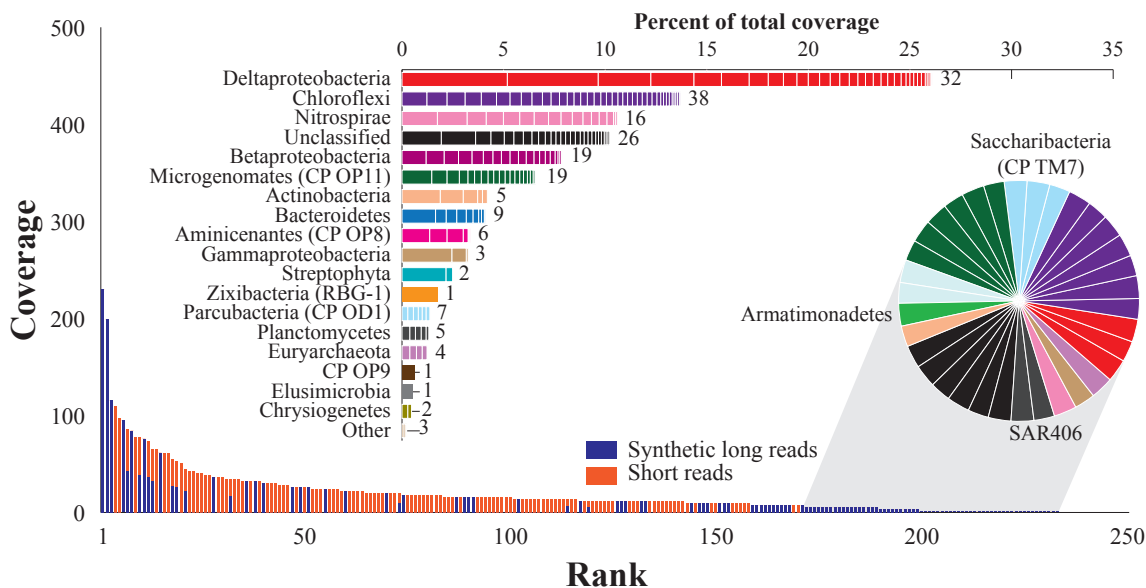

**Figure S6:** Community composition for the 6 m sample, based on species-level clustering (99% identity) of *rpS3* genes recovered from the long- and short-read assemblies. Colors in rank abundance curve (bottom) indicate origin of genes (short-/long-read sequences), coverages are normalized by number of bps in the 5 m sample. Stacked bar graph (top) shows abundance of phyla and Proteobacteria classes in the community, stacked boxes indicate abundance of individual species (number of species indicated). Phylum/class affiliations for *rpS3* genes recovered from long-read sequences with zero coverage by the short-read data are provided in the pie chart (phylum colors are identical to stacked bar graph).

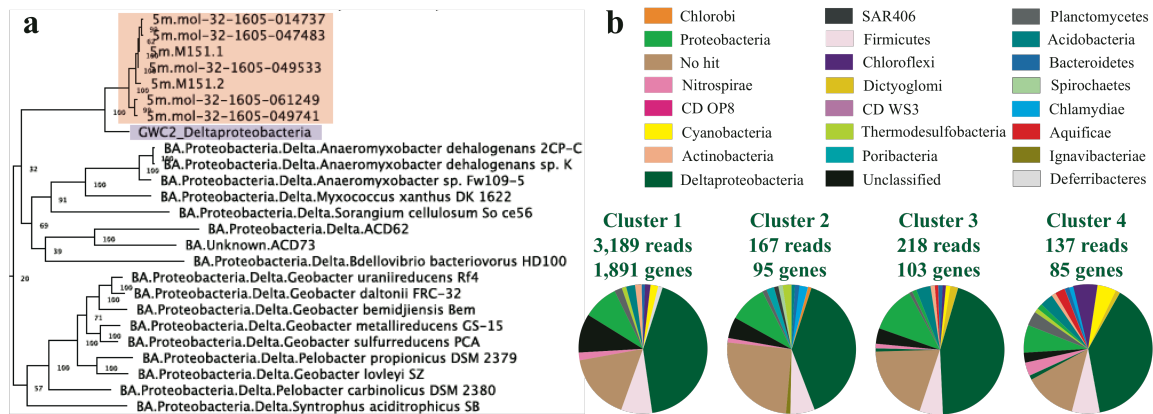

**Figure S7:** (a) Concatenated ribosomal protein tree containing sequences from cluster 1 that carry ribosomal protein genes places these sequences within the Deltaproteobacteria (refer to concatenated\_rp\_tree.pdf for complete tree). (b) Taxonomic affiliations of the four long-read clusters with 100 reads or more based on best blast hits of protein coding genes.

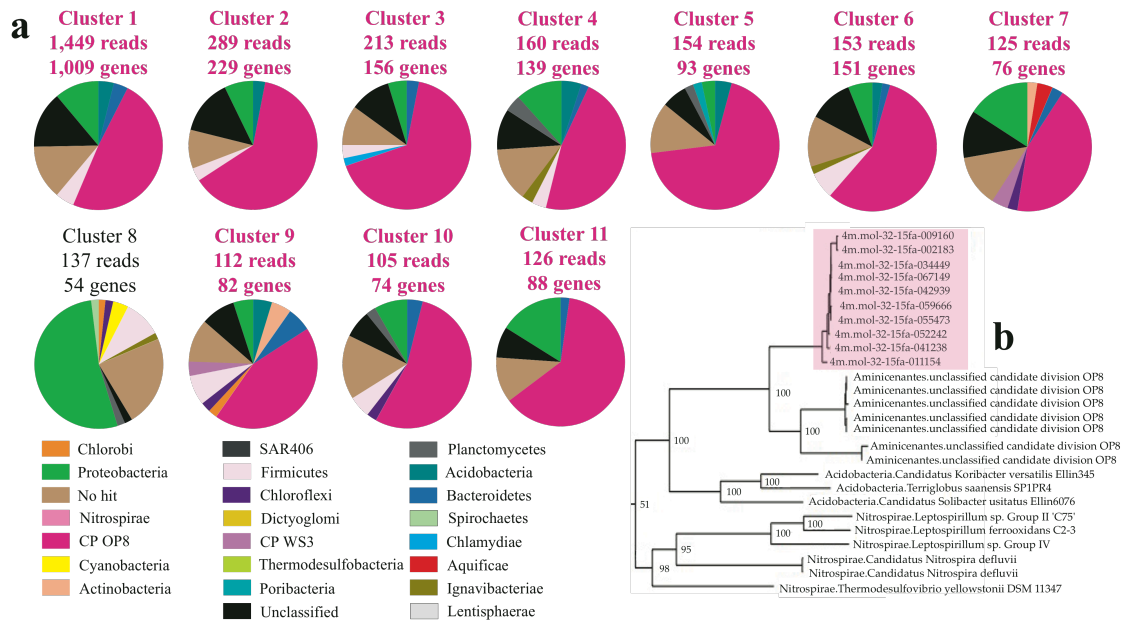

**Figure S8:** (a) taxonomic profiles for 11 clusters with 100 reads or more from the 4 m sample (based on best blast hits of protein coding genes). Profiles of all clusters but cluster 8 have CP OP8 (Aminicenantes) as the dominant phylum. (b) Concatenated ribosomal protein tree that contain sequences from cluster 6 carrying ribosomal protein genes supports CP OP8 assignment for these organisms (refer to concatenated\_rp\_tree.pdf for complete tree).



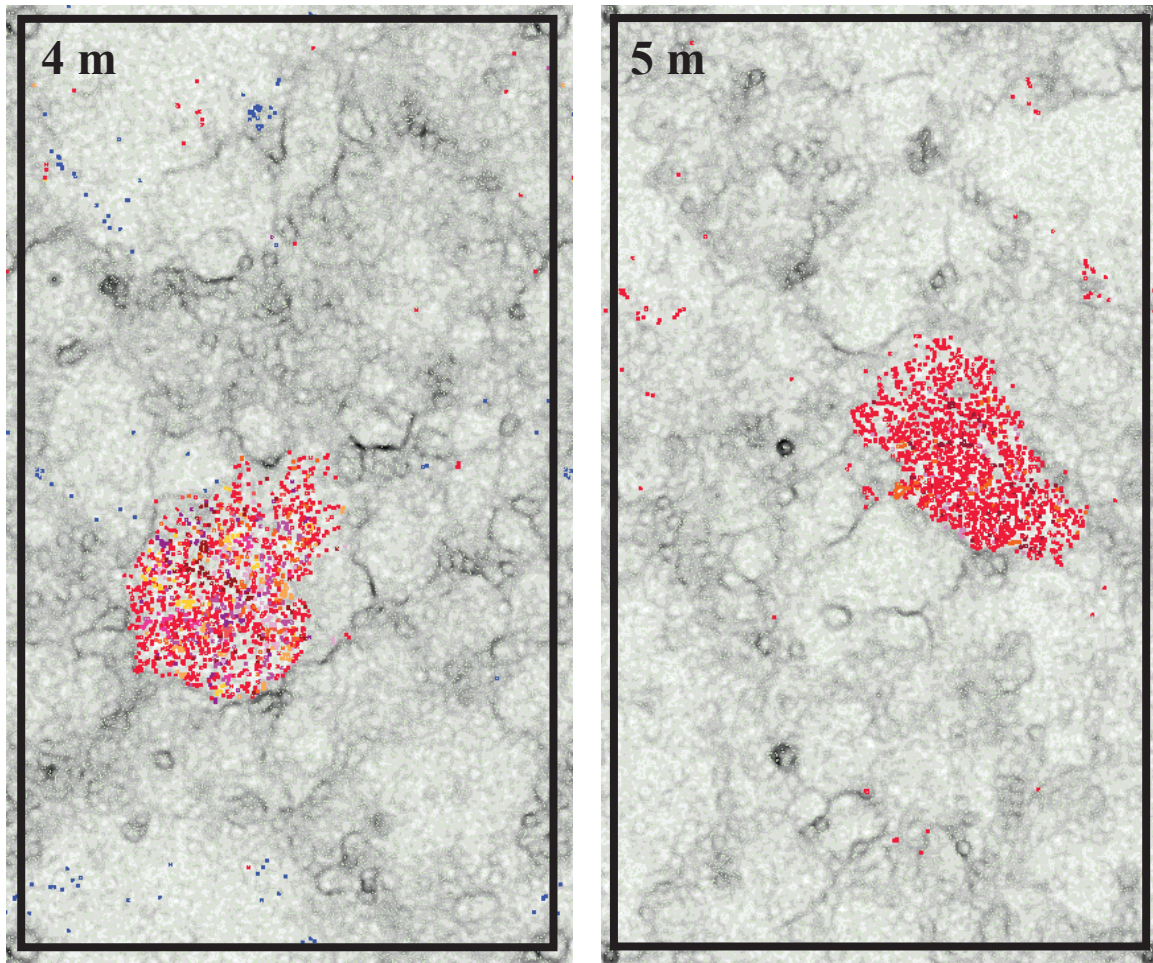

**Figure S9:** Emergent Self Organizing Map (ESOM) using 3-mer frequencies for synthetic long-reads in the 4 m (left) and 5 m (right) samples. Each datapoint represents a read, colored datapoints show sequences from one of the overlap-based clusters (**Fig. S7** for the 5 m sample and **Fig. S8** for the 4 m). Blue datapoints in the 4 m sample (spread outside the main cluster of colored datapoints) belong to cluster 8 whose taxonomic profile is different from the rest of the clusters.



## Assembly of synthetic long-reads with Lola

In order to assemble the data we wrote a program that implements an overlap strategy for assembly. The assembly process consists of 2 steps: (i) identification of overlaps between synthetic long-reads and (ii) assembly of reads based on these overlaps. Here we describe the two steps.

*Step I: identifying overlaps.* Given a % identity threshold  $p$  and an overlap size threshold  $q$  we consider the following five possible overlap types between a pair of sequences A and B that align at  $p$  or more percent identity over at least  $q$  bps (**Fig. S10**):

1. **Identity** – both A and B overlap throughout their whole lengths.
2. **Contained** – either A or B but not both are covered throughout their whole length.
3. **End-end** – overlapping regions includes exactly one of A's ends (5' or 3') and exactly one of B's ends such that A's covered end falls inside B and vice versa.
4. **End-mid** – any other overlap that involves exactly one of A or B's ends.
5. **Shared** – any other overlap.

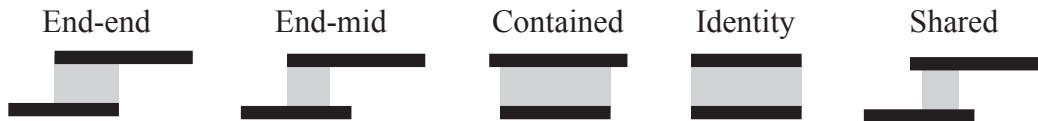

**Figure S10:** types of overlap (gray regions) between sequences (black lines).

The goal of the first step is to identify all overlaps in the data and decide the type of each one. Step (i) is performed as follows:

1. Remove all reads shorter than  $q$  bps.
2. Run a self-blast of the read database using parameters  $-F F -r 1 -q -5 -e 1e-20$ . These parameters should result with alignments that have high percent identity and are potentially short.
3. Keep all alignments that are at least  $0.6*q$  bps long (we used  $q=500$ ) with percent identity of at least  $(p-1)\%$  (we used  $p=99$ ). These alignments serve as seeds and will be further checked.
4. For each seed compute the coordinates for the maximal overlap possible between the two reads. Coordinates are computed considering the seed alignment. Based on calculated coordinates decide which overlap types are possible for the pair of reads. Go over the next steps until the conditions for one of the overlap types are met.
5. For potentially identical read pairs align the two sequences using the Needleman-Wunsch global alignment algorithm [7]. Set overlap type to “identity” if sequences align at  $(p-1)\%$  or more.

6. For potential contained overlaps use a variant of the Needleman-Wunsch algorithm that finds the best alignment between a whole sequence A vs. part (or whole) of sequence B. The algorithm uses the following scoring scheme:

```

for(i=0; i<=length(A); i++)
    F(i,0) = d*i;
for(j=0; j<=length(B); j++)
    F(0,j) = 0;
for(i=1; i<=length(A); i++)
    for(j=1; j<=length(B); j++) {
        Match = F(i-1,j-1) + S(Ai, Bj)
        Delete = F(i-1, j) + d
        Insert = F(i, j-1) + d
        F(i,j) = max(Match, Insert, Delete)
    }
}

```

Search for best alignment starts at the position with the highest score in row  $F(\text{length}(A), *)$ . If alignment at  $(p-1)\%$  or more was determined overlap type was set to “contained”.

7. For potential edge-edge overlaps we used another variant of the Needleman-Wunsch dynamic programming algorithm that finds the best alignment between two sequence ends. The following scoring scheme is applied in order to find the best alignment between the suffix of A and the prefix of B that is at least  $q$  bps long:

```

for(i=0; i<=length(A); i++)
    F(i,0) = d*i;
for(j=0; j<=length(B)-1; j++)
    F(0,j) = 0;
for(i=1; i<=length(A); i++)
    for(j=1; j<=length(B); j++) {
        Match = F(i-1,j-1) + S(Ai, Bj)
        Delete = F(i-1, j) + d
        Insert = F(i, j-1) + d
        F(i,j) = max(Match, Insert, Delete)
    }
}

```

Search for best alignment starts at the position with the highest score in column  $F(*, \text{length}(B))$ . The overlap type is set to edge-edge if the aligned region is at least  $q$  bps long at  $\%$  identity of at least  $(p-1)$ .

8. Otherwise the two reads are aligned using the Smith-Waterman local alignment algorithm [8]. Overlap type is set to “shared” if overlapping region is at least  $q$  bps long at  $(p-1)\%$  identity.

This part of the tool was implemented in C++. Code is available in **Supplementary file overlap-1.02.tar.gz** and is maintained under <https://github.com/CK7/overlap>.

*Step II: assembly.* The following process was repeated until no more reads were left that could be used as contig starters.

1. Remove all reads that are contained in another read. Also remove one of every pair of identical reads.
2. Identify an unused read  $r^{\text{ext}}$  with one or more end-end overlaps at  $p\%$  identity and no end-mid overlaps on one side  $s^{\text{ext}} \in \{5, 3\}$  and no end-end connections on the other end.  $r^{\text{ext}}:s^{\text{ext}}$  is the extension end, set  $r^{\text{ext}}$  as the current assembled contig. Stop assembly if no extension end found.
3. Pick an unused read  $r^{\text{new}}$  and its end  $s^{\text{new}}$  that has an end-end overlap with  $r^{\text{ext}}:s^{\text{ext}}$  such that adding  $r^{\text{new}}$  to the current assembled contig elongates it the most.
4. For every other read that overlaps with  $r^{\text{ext}}:s^{\text{ext}}$  check whether it also has an end-end overlap with  $r^{\text{new}}:s^{\text{new}}$  at  $(p-1)\%$  identity over its other end. If not – stop assembling the current contig and go to (2).
5. For every other read that overlaps with  $r^{\text{new}}:s^{\text{new}}$  check whether it also has an end-end overlap with  $r^{\text{ext}}:s^{\text{ext}}$  at  $(p-1)\%$  identity over its other end. If not – stop assembling the current contig and go to (2). Do the same if  $r^{\text{new}}:s^{\text{new}}$  has an end-mid overlap.
6. Add  $r^{\text{new}}$  to the current assembled contig and mark it as used. Set  $r^{\text{ext}} = r^{\text{new}}$  and  $s^{\text{ext}} = 8-s^{\text{new}}$  (the opposite end of  $r^{\text{new}}$ ).
7. If  $r^{\text{ext}}:s^{\text{ext}}$  has no end-end connections with unassembled reads, or if it has an end-mid connection – stop assembling current contig and go to (2).
8. Otherwise go back to (3) and continue assembling the current contig.

This part of the program was implemented in perl and is available in **Supplementary file Lola-1.02.tar.gz** (program is maintained under <https://github.com/CK7/Lola>).

### **Scaffolding of short-read assemblies using synthetic long-reads**

Scaffolding of the short-read assembly was performed similarly to the assembly of the synthetic long-reads. Only synthetic long-reads that overlapped with scaffolds from the same depth sample's corresponding short-read assembly were used for this analysis. Once the set of synthetic long-reads that overlaps with the corresponding short-read assemblies were identified, we used the assembly program described above in order to assemble the data.

## Reconstruction of syntenic regions

*Read clustering.* Unassembled synthetic long-reads and assembled contigs from each sample were clustered based on end-end, identity or contained overlaps only, using a 90 % threshold. This threshold roughly represents the expected % identity between similar regions of close species.

*Gene prediction.* Genes for all reads longer than 5 kbp were predicted using prodigal [10] with parameters `-m` and `-c`. Next, all sequences shorter than 5 kbp as well as regions on >5 kbp sequences with no predicted genes were blasted (blastx) against predicted proteins. All regions that aligned at 75 % identity over at least 90 % of the hit length, or with end-end overlap, were marked as new genes. This process was repeated iteratively until no new genes were found. Note that exact start/end coordinates of predicted genes were not important for the purpose of the synteny analysis, only the presence of the genes was utilized.

*Clustering of proteins to protein families.* All predicted proteins were clustered into families using uclust [11] with a 75 % identity threshold. Singleton families were excluded from further analysis.

*Reconstructing gene order in syntenic regions.* The following steps were taken for all reads in each cluster (separately):

1. Construct neighborhood graph based on gene location on long-read sequences. Nodes in the graph represent gene families and edges connect two nodes whose genes were found to be neighbors on at least one sequence. Keep weights (number of times each gene/neighborhood relation) were observed.
2. Remove from the graph all edges with weight = 1.
3. Resolve junctions in the graph.
4. Identify bubbles, namely components in the graph with exactly one “in” and one “out” node connecting them to the rest of the graph and two or more paths connecting the in and out nodes within the component.
5. Identify linear components, i.e. components in the graph with one in and one out node that have exactly one path connecting them.
6. Connect bubbles and linear components that share the same in/out nodes such that no other components share the node with them.

Junctions are formed when the same gene family appears in multiple locations on the genome (e.g., due to duplication events). Junctions were resolved based on context of the members of junction protein families: if certain members only appear together with certain genes while other members of the family appear in context with different genes then the family could be split into two sub-families with members being clustered based on their neighbors.

Bubbles were identified based on Depth First Search (DFS) with maximal number of steps = 10. This is performed using each end of each node as root with all nodes visited on each path being kept. Once all paths were visited we try the root with every node visited, from closest to furthest, as the pair of in/out nodes to the component: if all paths that start at the root node go through the other node, then these two nodes bound a bubble component.

Code for the program that implements the above algorithm for gene synteny reconstruction is available in **Supplementary file synteny-1.02.tar.gz** and is maintained under <https://github.com/CK7/synteny>.

**Table S3** Statistics for protein clusters representing marker genes for the Deltaproteobacterium recovered from the 5 m sample. Colors indicate median % identity (dark green: >95, light green: >90, yellow: >85, orange: >80, red: missing).

| Marker gene                         | # of complete/all proteins | Median % identity (Low, High) |
|-------------------------------------|----------------------------|-------------------------------|
| ribosomal protein L14               | 35/37                      | 100.0 (96.7, 100.0)           |
| ribosomal protein L18               | 13/13                      | 91.5 (86.9, 100.0)            |
| ribosomal protein S12               | 6/11                       | 92.2 (89.6, 100.0)            |
| <i>gyrA</i>                         | 3/6                        | 99.2 (99.1, 99.9)             |
| ribosomal protein S20               | 9/9                        | 86.5 (83.5, 100.0)            |
| ribosomal protein L13               | 2/2                        | 96.0 (96.0, 96.0)             |
| ribosomal protein S11               | 7/8                        | 96.9 (93.8, 100.0)            |
| ribosomal protein S4                | 7/9                        | 93.2 (91.7, 100.0)            |
| ribosomal protein S7                | 11/11                      | 91.7 (87.8, 100.0)            |
| ribosomal protein L5                | 22/25                      | 93.3 (91.2, 100.0)            |
| ribosomal protein L1                | 3/3                        | 100.0 (100.0, 100.0)          |
| ribosomal protein L6P-L9E           | 12/19                      | 91.1 (89.9, 100.0)            |
| ribosomal protein L21               | 5/5                        | 95.2 (85.6, 100.0)            |
| ribosomal protein L11               | 3/4                        | 99.3 (99.3, 100.0)            |
| ribosomal protein S5                | 12/12                      | 96.4 (86.7, 100.0)            |
| ribosomal protein L23               | 15/15                      | 90.5 (87.2, 100.0)            |
| ribosomal protein S15               | 2/2                        | 96.6 (96.6, 96.6)             |
| ribosomal protein L10               | 2/3                        | 100.0 (100.0, 100.0)          |
| alanyl tRNA synthetase              | 6/17                       | 91.2 (89.1, 99.5)             |
| <i>recA</i>                         | 12/12                      | 97.1 (92.7, 100.0)            |
| ribosomal protein L3                | 16/16                      | 93.9 (91.5, 100.0)            |
| ribosomal protein S2                | 10/11                      | 96.7 (90.2, 100.0)            |
| Preprotein translocase subunit SecY | 8/11                       | 95.9 (94.5, 100.0)            |
| ribosomal protein L30               | 10/10                      | 88.5 (87.1, 100.0)            |
| ribosomal protein S17               | 42/45                      | 97.8 (81.7, 100.0)            |
| leucyl-tRNA synthetase              | 7/11                       | 96.5 (89.5, 99.9)             |
| arginyl tRNA synthetase             | 20/24                      | 97.1 (84.7, 100.0)            |
| ribosomal protein S3                | 43/46                      | 98.2 (92.6, 100.0)            |
| ribosomal protein S19               | 14/14                      | 96.8 (90.3, 100.0)            |
| ribosomal protein L16-L10E          | 45/49                      | 98.5 (91.7, 100.0)            |
| ribosomal protein L22               | 14/34                      | 96.4 (93.6, 100.0)            |
| Valyl-tRNA synthetase               | 11/15                      | 98.2 (90.2, 100.0)            |
| Histidyl-tRNA synthetase            | 10/12                      | 87.9 (84.7, 100.0)            |
| ribosomal protein S13               | 8/9                        | 92.9 (90.6, 100.0)            |
| ribosomal protein S9                | 2/3                        | 99.2 (99.2, 99.2)             |
| ribosomal protein S6                | 5/5                        | 84.1 (82.6, 100)              |
| ribosomal protein L27               | 5/5                        | 100.0 (90.6, 100.0)           |
| ribosomal protein L29               | 49/49                      | 98.4 (84.6, 100.0)            |
| Phenylalanyl-tRNA synthetase alpha  | 4/6                        | 98.3 (98.0, 98.8)             |
| ribosomal protein L15               | 9/10                       | 89.0 (87.0, 100.0)            |
| ribosomal protein L20               | 4/4                        | 98.3 (96.6, 100.0)            |
| ribosomal protein S10               | 13/15                      | 98.1 (97.1, 100.0)            |
| aspartyl tRNA synthetase            | 9/9                        | 92.4 (90.8, 99.8)             |
| ribosomal protein S18               | 4/4                        | 92.8 (91.1, 100.0)            |
| ribosomal protein L24               | 29/33                      | 95.5 (86.6, 100.0)            |
| ribosomal protein L4                | 15/16                      | 91.8 (89.9, 100.0)            |
| ribosomal protein S8                | 17/20                      | 88.6 (83.3, 100.0)            |
| ribosomal protein S16               | 3/3                        | 94.7 (93.6, 98.9)             |
| ribosomal protein L17               | 7/8                        | 82.3 (68.4, 100.0)            |
| ribosomal protein L2                | 11/16                      | 94.1 (92.3, 100.0)            |
| ribosomal protein L19               | 7/7                        | 95.4 (88.7, 100.0)            |

**Table S4:** Statistics for protein clusters representing marker genes for the CP OP8 phylotype recovered from the 4 m sample. Color scheme is similar to Table S3.

| Marker gene                         | Complete/Total | Median % identity (Low, High) |
|-------------------------------------|----------------|-------------------------------|
| ribosomal protein L14               | 10/10          | 100.0 (98.3, 100.0)           |
| ribosomal protein L18               | 9/9            | 98.4 (87.1, 100.0)            |
| ribosomal protein S12               | 9/9            | 96.9 (93.8, 100.0)            |
| <i>gyrA</i>                         | 3/7            | 99.3 (99.2, 99.9)             |
| ribosomal protein S20               | 9/9            | 100 (98.8, 100)               |
| ribosomal protein L13               | No hits found  |                               |
| ribosomal protein S11               | 14/15          | 96.9 (93.8, 100.0)            |
| ribosomal protein S4                | 15/15          | 95.2 (91.3, 100.0)            |
| ribosomal protein S7                | 7/10           | 94.9 (93.6, 100.0)            |
| ribosomal protein L5                | 8/11           | 99.4 (98.3, 100.0)            |
| ribosomal protein L1                | 7/7            | 94.3 (93.9, 100.0)            |
| ribosomal protein L6P-L9E           | 9/9            | 98.9 (89.5, 100.0)            |
| ribosomal protein L21               | 4/6            | 97.8 (96.1, 99.4)             |
| ribosomal protein L11               | 7/7            | 95.0 (94.3, 100.0)            |
| ribosomal protein S5                | 9/11           | 97.7 (87.9, 100.0)            |
| ribosomal protein L23               | 9/9            | 93.7 (91.8, 100.0)            |
| ribosomal protein S15               | 7/7            | 100.0 (96.6, 100.0)           |
| ribosomal protein L10               | 7/7            | 87.6 (85.9, 99.4)             |
| alanyl tRNA synthetase              | 3/7            | 98.1 (97.7, 99.4)             |
| <i>recA</i>                         | 10/13          | 96.9 (95.6, 100.0)            |
| ribosomal protein L3                | 9/9            | 95.8 (92.5, 100.0)            |
| ribosomal protein S2                | 4/4            | 99.2 (99.2, 100.0)            |
| Preprotein translocase subunit SecY | 10/15          | 96.5 (95.2, 100.0)            |
| ribosomal protein L30               | 12/12          | 93.0 (88.0, 100.0)            |
| ribosomal protein S17               | 10/10          | 100.0 (93.9, 100.0)           |
| leucyl-tRNA synthetase              | 4/9            | 97.6 (97.2, 99.6)             |
| arginyl tRNA synthetase             | No hits found  |                               |
| ribosomal protein S3                | 10/10          | 99.1 (96.8, 100.0)            |
| ribosomal protein S19               | 8/8            | 100.0 (95.8, 100.0)           |
| ribosomal protein L16-L10E          | 10/10          | 99.3 (94.3, 100.0)            |
| ribosomal protein L22               | 9/10           | 99.2 (92.5, 100.0)            |
| Valyl-tRNA synthetase               | 3/5            | 98.3 (98.1, 98.6)             |
| Histidyl-tRNA synthetase            | 5/6            | 96.0 (94.8, 99.8)             |
| ribosomal protein S13               | 14/14          | 97.6 (95.9, 100.0)            |
| ribosomal protein S9                | No hits found  |                               |
| ribosomal protein S6                | 6/8            | 97.8 (96.4, 100.0)            |
| ribosomal protein L27               | 6/6            | 98.8 (97.6, 100.0)            |
| ribosomal protein L29               | 10/10          | 100.0 (92.2, 100.0)           |
| Phenylalanyl-tRNA synthetase alpha  | 7/9            | 93.9 (88.6, 100.0)            |
| ribosomal protein L15               | 12/12          | 92.6 (84.5, 100.0)            |
| ribosomal protein L20               | 7/7            | 97.5 (96.6, 100.0)            |
| ribosomal protein S10               | 10/10          | 98.1 (96.2, 100.0)            |
| aspartyl tRNA synthetase            | 4/6            | 95.1 (94.6, 99.5)             |
| ribosomal protein S18               | 8/8            | 100.0 (97.6, 100.0)           |
| ribosomal protein L24               | 11/11          | 100.0 (90.9, 100.0)           |
| ribosomal protein L4                | 9/9            | 98.1 (92.3, 100.0)            |
| ribosomal protein S8                | 8/12           | 98.5 (93.2, 100.0)            |
| ribosomal protein S16               | 8/8            | 97.6 (92.9, 100.0)            |
| ribosomal protein L17               | 14/15          | 92.1 (83.3, 100.0)            |
| ribosomal protein L2                | 7/8            | 97.1 (94.9, 100.0)            |
| ribosomal protein L19               | 8/8            | 99.1 (98.2, 100.0)            |



## Strain variation for the Deltaproteobacteria clade

Multiple sequence alignment of the 46 *rpS3* genes from the Deltaproteobacteria clade reveals several groups of identical and near identical genes (**Fig. S11**). Clustering of these sequences using a 100 % threshold (DNA level) resulted with 28 clusters, 10 of which consist of multiple members. Mapping of short reads to the *rpS3* genes recovered from the long reads resulted with many reads that could not be mapped perfectly to any of the genes, suggesting that even more closely related versions of this gene may be present in the sample. Based on these results we estimate that Deltaproteobacteria clade in the 5 m sample consists of several dozen different strains. While the total coverage of the *rpS3* genes from these strains by the Illumina short read data approaches 1,000x, we did not find any *rpS3* genes in the Illumina assembly for the 5 m sample that align to any of the 46 *rpS3* genes considered here at more than 85% identity. Therefore, we attribute the lack of short read assembly for these genomes to high sequence heterogeneity that cannot be handled by short read assemblers (**Fig. S12** and **Fig. S13**). For comparison, mapping of Illumina reads to the *rpS3* gene of RBG-1 shows very few SNPs, none of them appears in more than a few reads (**Fig. S14**). This suggests that RBG-1 is represented by a single abundant strain, which enables assembly.

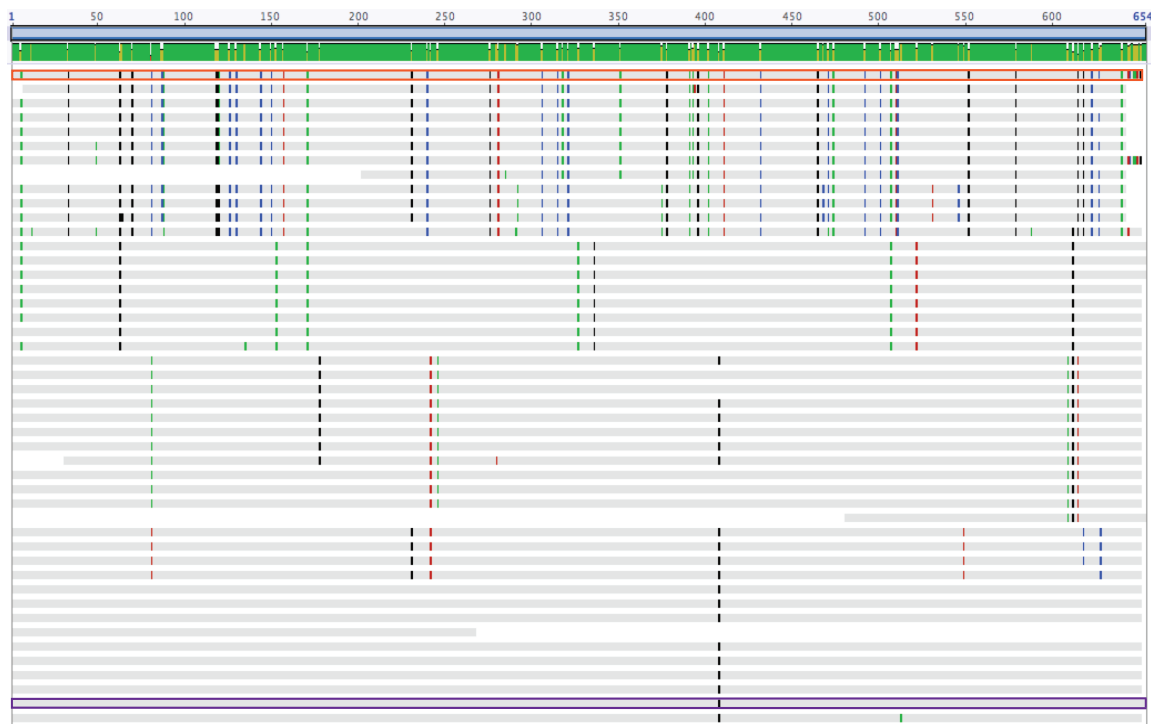

**Figure S11:** multiple sequence alignment of the 46 genes from the *rpS3* cluster of the Deltaproteobacteria clade (5 m sample). Genes used for mapping of Illumina short reads in **Fig. S12** and **S13** are encircled in purple and orange, respectively.

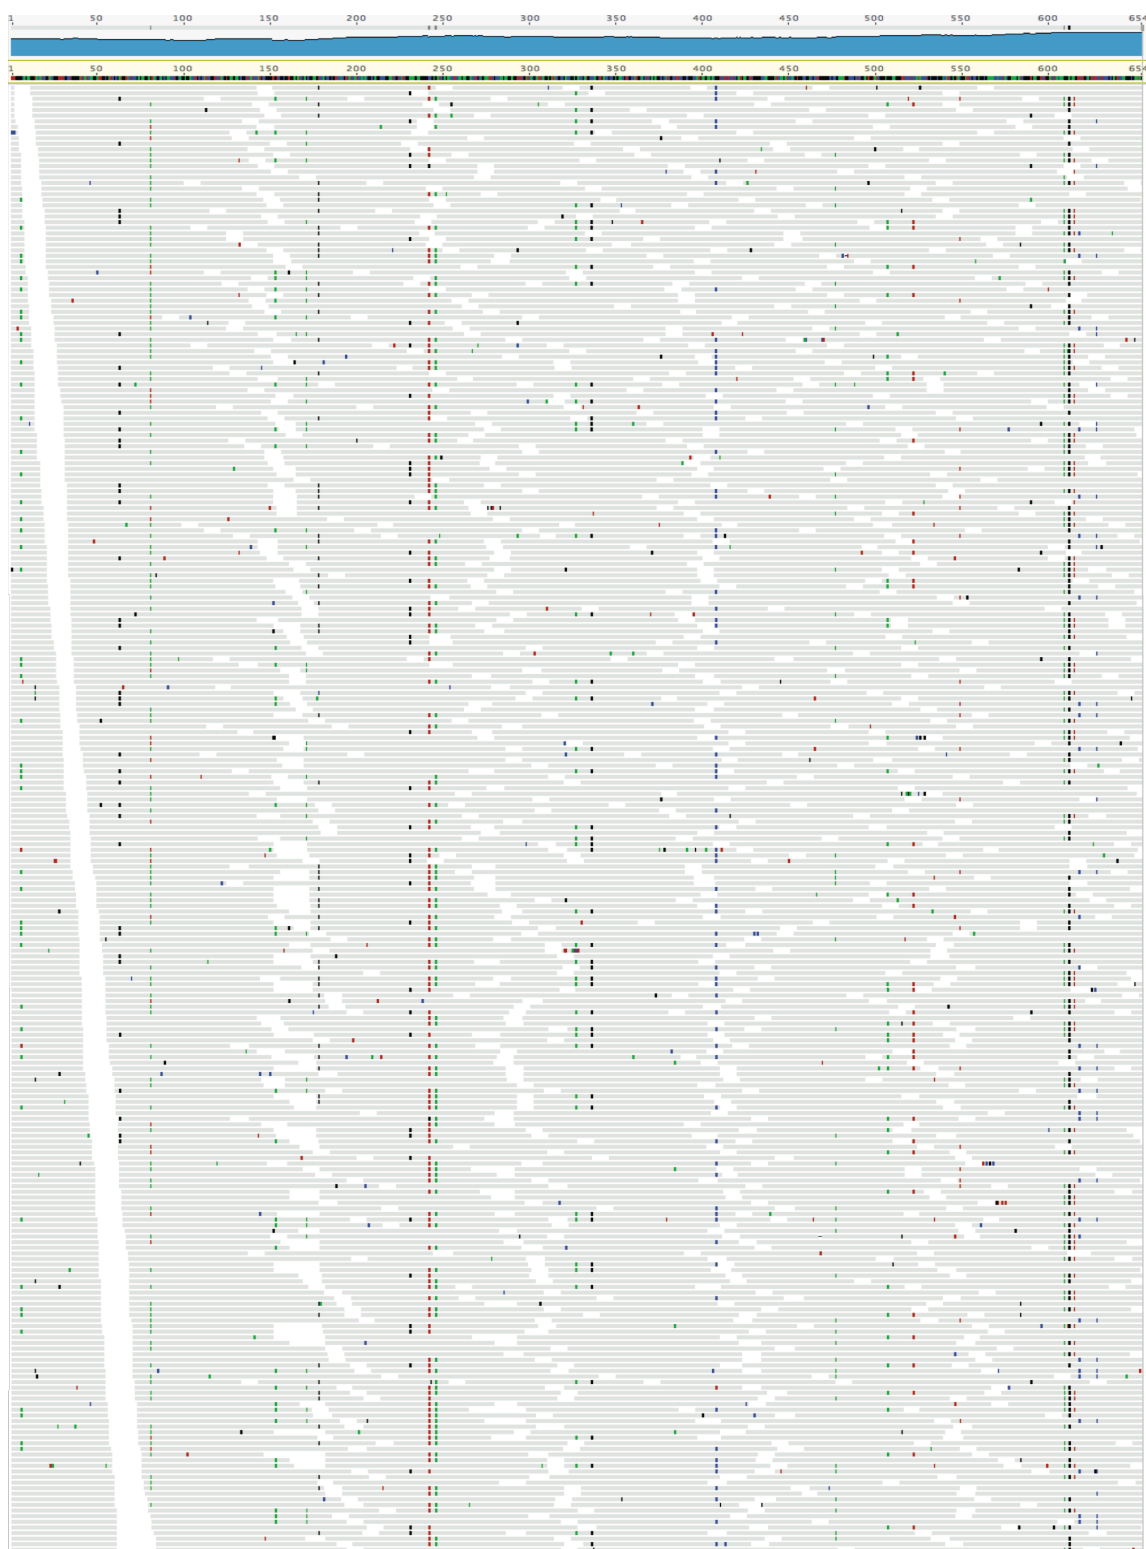

**Figure S12:** read mapping to one of the *rpS3* genes from the Deltaproteobacteria clade (encircled in purple in **Fig. S11**) reveals high degree of strain variation, indicated by multiple SNPs (colored dots).

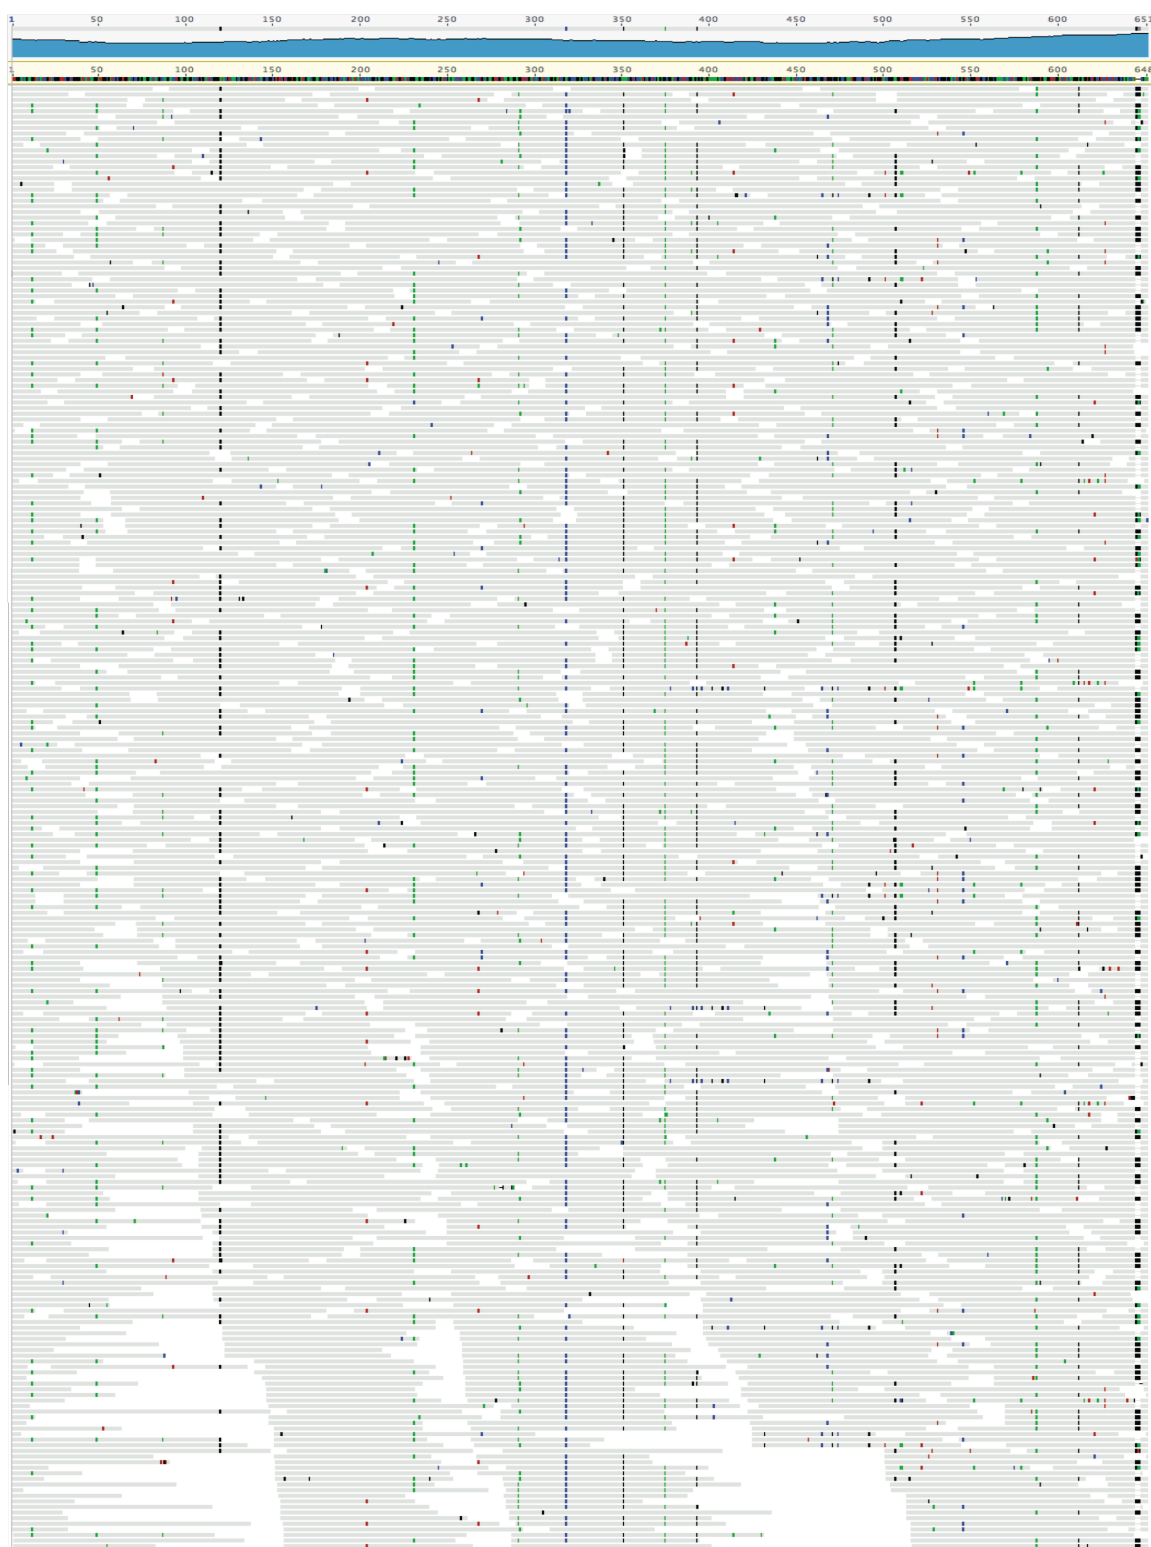

**Figure S13:** read mapping to a different *rpS3* genes from the Deltaproteobacteria clade (encircled in orange in **Fig. S11**) shows high number of SNPs as well (colored dots).

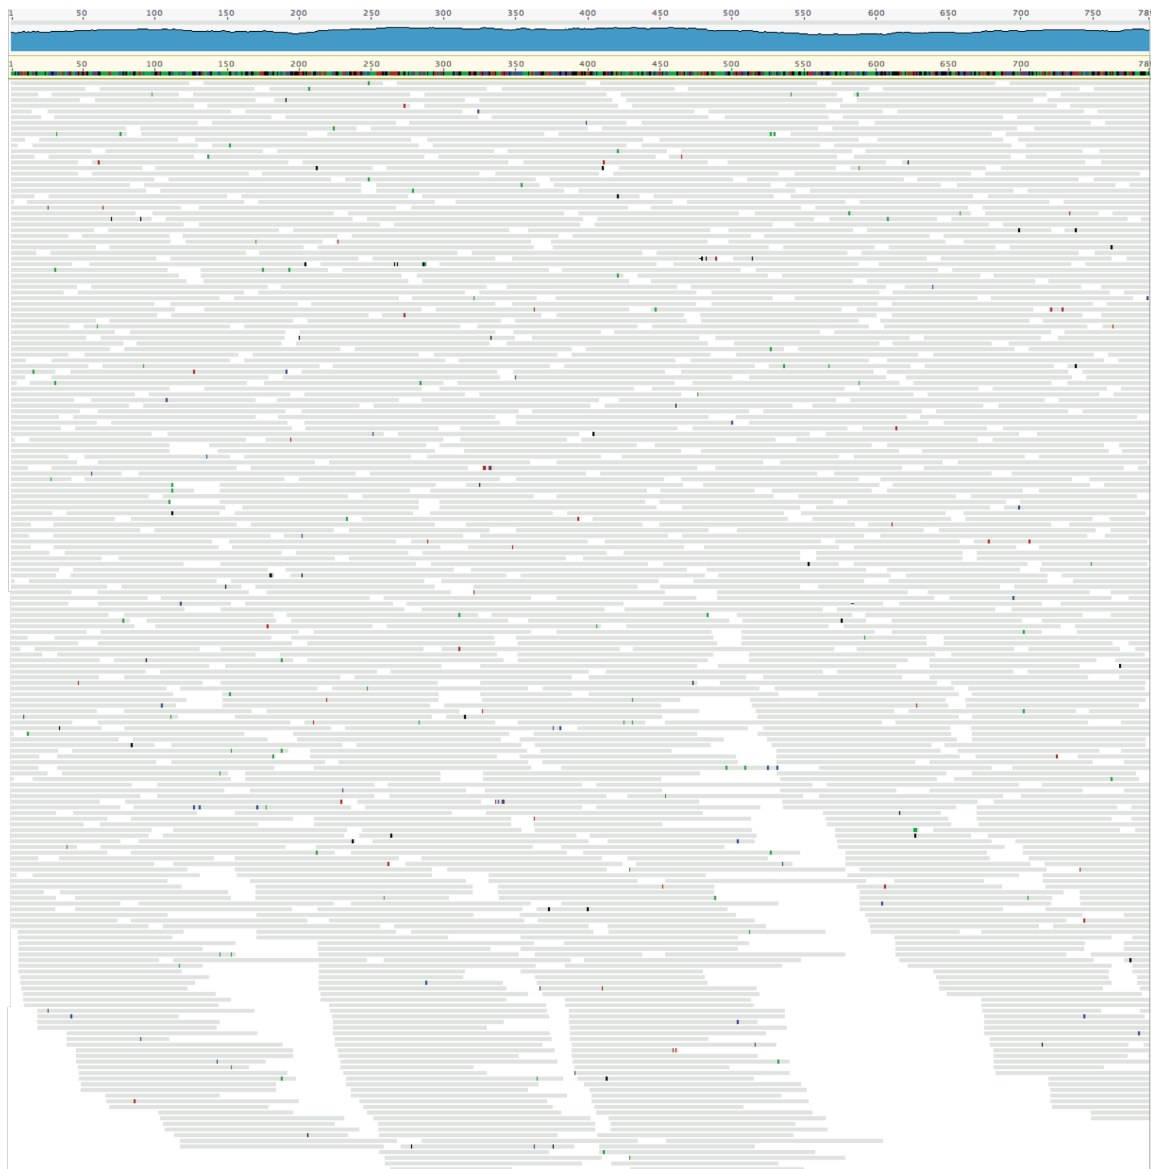

**Figure S14:** reads from the 5 m sample that are mapped to the RBG-1 *rpS3* gene are consistent with the assembled genome, suggesting the presence of a single abundant strain in the sample.

### Recovery of 16S rRNA genes and tree construction

16S rRNA genes were recovered from the short- and long-read assemblies using rnammer [12] with parameters `-multi -S bac,arc`. All genes longer than 800 bps were clustered using uclust with 99% identity threshold with only one representative from each cluster being used. The three best hits for each representative from the SILVA database ([13], release 115) were used for phylogenetic tree construction. In addition, we included a set of 762 reference 16S sequences from sequenced genomes spanning different phyla. Sequences were aligned using SSU-ALIGN [14] and manually inspected using Geneious. Maximum likelihood trees were reconstructed using RAxML [15] with parameters `-f a -m GTRCAT -N 100`.

## Using the *rpS3* gene for community structure inference

To evaluate community structure we considered both the genes encoding the 16S SSU rRNA and the ribosomal protein S3 (*rpS3*). The 16S SSU rRNA gene is a commonly accepted phylogenetic marker gene [16], however assembly of this gene from metagenomic data often fails due to its high conservation. We were able to identify 355, 495 and 289 16S rRNA genes from the 4, 5 and 6 m respectively with the majority of genes being recovered from the long-read data. Clustering the genes using a 99% identity cutoff (capturing roughly the same genus) revealed that roughly one quarter of the genes recovered from the long-read sequences, in all samples, were clustered with at least one other long-read 16S rRNA gene, compared to none of the genes recovered from short reads (**Fig. S15**). The largest cluster in the 5 m sample, which represented the most abundant genus in both the 5 and 6 m samples, did not have any representatives in the short-read assemblies but contained 14 (5 m) and 9 (6 m) genes from the long-read datasets. In fact, the majority of clusters with at least 3 members in all samples (23/32) and the vast majority of clusters with at least 4 members (8/10) were represented by long-read sequences only. Low clustering levels of the short-read sequences are not due to coverage as many genes recovered from synthetic long-read had robust coverage from mapped short reads. This highlights the fact that the 16S SSU rRNA gene is not a reliable choice for inferring community structure when used directly from assembled metagenomic short read data.

We also considered using the gene cassette of the 16 ribosomal proteins previously proposed [17] and used by Castelle *et al.* [1] for the 5 m sample in this study. This set of genes provides a reliable phylogenetic placement that is required for taxonomic assignment of novel genomes. On the other hand, at least eight of the genes need to be present on the same sequence in order for their sequence to be considered, which may be too restrictive for genomes whose assembly is fragmented. As a result, the number of organisms that can be detected using concatenated ribosomal proteins may be artificially low (see below).

Here we evaluated community structure for the three samples using the ribosomal protein S3 (RpS3), which is the product of a universal single-copy gene. This protein is less reliable for high-resolution phylogeny than both the gene encoding the 16S SSU rRNA and concatenated ribosomal proteins as it is shorter than either of those options, and thus has fewer alignment positions to direct placement. Nevertheless this gene is divergent enough to be recovered through metagenomic assembly (unlike the 16S gene) and can be recovered from fragmented genomes as well (unlike the ribosomal proteins). The number of *rpS3* genes recovered from the short-read assembly was significantly higher than the 16S rRNA genes for all samples (**Fig. S15**). For comparison, the number of *rpS3* genes recovered from synthetic long-reads was smaller than the number of 16S genes recovered from the same data, both because the 16S gene is twice as long as the *rpS3* gene and also because the 16S gene sometimes appears in more than one copy per genome (**Fig. S15**). This result suggests that many more species can be detected using the *rpS3* gene compared to the 16S SSU rRNA gene for short-read assemblies. The number of *rpS3* genes that were recovered from the short-read assembly of the 5 m sample is roughly twice the number of ribosomal protein sets reported by Castelle *et al.* However no *rpS3* genes were assembled from the short-read data for most of the abundant species in all samples, probably due to a high degree of strain variation.

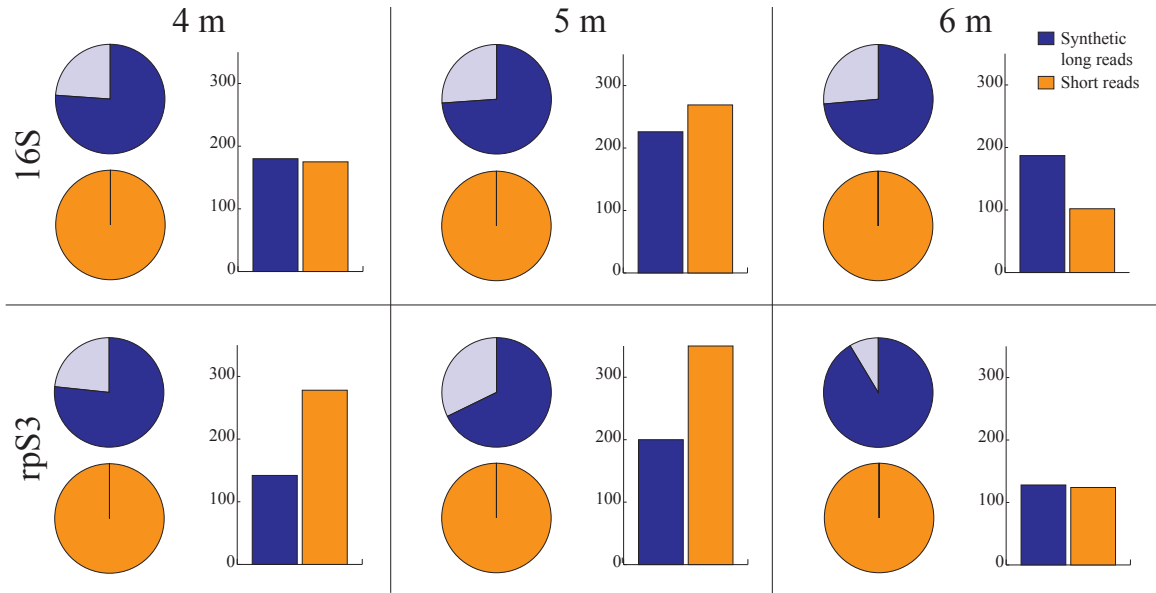

**Figure S15:** Pie charts: fraction of 16S SSU rRNA (top row) and *rpS3* (bottom row) genes in clusters with no other gene of the same technology (dark) or with at least one other gene from the same technology (light) for the 4, 5 and 6 m samples. Column bars: total number of unclustered 16S SSU rRNA (top) and *rpS3* (bottom) genes found using each technology.

### Computing % identity thresholds for *rpS3* for species- and genus-level clustering

In order to generate the rank abundance curves in **Fig. 2**, **S5**, and **S6**, we clustered *rpS3* genes into species and genera groups using thresholds that were calculated according to the following model. Our goal was to compute thresholds that will allow us to determine whether a pair of *rpS3* genes represents two genomes from the same species, same genus or something else, based on the % identity of their global alignment (DNA sequence). In order to do this we developed the following model that enabled us to compute, for each % identity, the fraction of *Rps3* protein pairs that are expected to belong to the same species and genus. Once these were calculated we chose thresholds for which the majority of pairs aligned at this % identity or higher indeed belonged to the same species/genus.

**Theory:** Two *rpS3* genes  $s_1$  and  $s_2$  that are  $x\%$  similar can be in exactly one of two states with respect to a taxonomic level  $t \in \{\text{species, genus, family, order, class, phylum, domain, other}\}$ :

- State  $A_t$  –  $s_1$  and  $s_2$  belong to the same taxonomic group at level  $t$  but not to any taxonomic group at level lower than  $t$  (e.g. same genus but not the same species).
- State  $B_t$  –  $s_1$  and  $s_2$  belong to a taxonomic group at a level different than  $t$

Given % identity  $x$  for the global alignment of  $s_1$  and  $s_2$  it is possible to determine the probability that  $s_1$  and  $s_2$  are in state  $A_t$  given the following information:

- $p(x|A_t)$  – the probability that  $s_1$  and  $s_2$  are  $x\%$  similar for taxonomic level  $t' \in \{\text{species, genus, family, order, class, phylum, domain, other}\}$

- $p(A_{t'})$  – the probability that a random pair  $s_1$  and  $s_2$  will be in state  $A_{t'}$  for taxonomic level  $t'$ .

Both these probabilities may change between different communities and taxonomic groups. In fact, it is practically impossible to compute either of them, however we provide here rough estimations for both of them (see below).

In order to compute the probability  $p(A_t|x)$  we will estimate the fraction of pairs in state  $A_t$  from all pairs of *rpS3* genes that are  $x\%$  similar. If our sample consists of  $S$  cells (and thus  $S$  copies of the *rpS3* gene) then there are  $S*(S-1)/2$  different pairs, of which

$$N(A_{t'}) = p(A_{t'}) * S*(S-1)/2$$

Are in state  $A_{t'}$ , and

$$N^x(A_{t'}) = p(x|A_{t'}) * N(A_{t'}) = p(x|A_{t'}) * p(A_{t'}) * S*(S-1)/2$$

are both in state  $A_{t'}$  and the % identity of their global alignment is  $x$ . The probability  $p(A_t|x)$  can then be estimated through

$$\begin{aligned} p(A_t|x) &= N^x(A_t) / \sum N^x(A_{t'}) = [p(x|A_t) * p(A_t) * S*(S-1)/2] / [\sum p(x|A_{t'}) * p(A_{t'}) * S*(S-1)/2] \\ &= p(x|A_t) * p(A_t) / \sum (p(x|A_{t'}) * p(A_{t'})) \end{aligned}$$

Which is the probability we are looking for.

*Computing  $p(x|A_{t'})$ .* In order to compute these probabilities we used a set of *rpS3* genes from 1,978 genomes downloaded from the NCBI website. Global alignments for the genes were calculated using usearch (-allpairs\_global program), and distributions of % identity were calculated as follows:

```
For t in {species, genus, order, class, phylum} do
  For taxonomic group o at level t do
    Collect all % identities for all pairs of sequences  $s_1, s_2 \in o$ 
    Find the median value and add it to the distribution of t
    Find s with sum of % identities vs all other  $s' \in o$  is the highest
    Remove all  $s' \in o$  except s.
  End for
End for
```

The above procedure was designed to avoid biases that are related to the number of sequenced genomes from each taxonomic group by taking one representative from each group.

Our computations showed that no % identity for any pair from  $t' \in \{\text{order, class, phylum}\}$  was high enough to impact the computation of thresholds for species and genus. Consequently we discarded these taxonomic levels as well as the domain level from further analysis.

*Calculating  $p(A_{t'})$ .* Obtaining these probabilities is practically impossible for various reasons: not only the number of cells from each taxonomic group is unknown but even



the assignment to taxonomic groups is not available yet for most of the organisms in our communities. Note also that  $p(A_r)$  may be different for different environments. Here we estimated  $p(A_r)$  using the 16S sequences extracted from the long-read sequences, assuming that these were sampled randomly from the sample. We clustered the 16S sequences based on the following thresholds:

- Species: 99% [18]
- Genus: 94% [19,20]
- Family: 90% [19,20]

These values are in no way exact but are expected to roughly divide our 16S rRNA SSU sequences into phylotypes at these levels. Sequences were aligned using usearch. Next, the different probabilities were estimated based on 100,000 random samplings of sequence pairs. Results are summarized in Table S5.

**Table S5:** frequency of 16S SSU rRNA gene pairs in the 3 depths. Frequency was computed through simulations.

|                | <b>4 m: # (%)</b> | <b>5 m: # (%)</b> | <b>6 m: # (%)</b> |
|----------------|-------------------|-------------------|-------------------|
| <b>Species</b> | 829 (0.83)        | 824 (0.82)        | 940 (0.94)        |
| <b>Genus</b>   | 692 (0.69)        | 544 (0.54)        | 1,205 (1.21)      |
| <b>Family</b>  | 833 (0.83)        | 552 (0.55)        | 1121 (1.12)       |
| <b>Other</b>   | 97,646 (97.65)    | 98,080 (98.08)    | 96,734 (96.73)    |

*Calculating thresholds.* Using the above we calculated the expected fraction of *rpS3* gene pairs that belong to the same species and genus for the 3 samples (Table S6). Based on these calculations we conclude that thresholds of 99% for species and 90% for genus levels provide a reasonable level of confidence ( $> \sim 80\%$ ) in the relatedness of pairs of *rpS3* genes.

**Table S6:** fraction of *rps3* gene pairs that align at % identity and share the same species (genus) for each sample. For example: 95.1% of the *rps3* pairs that align at 100 % identity in the 4 m sample share the same species while 100% of these pairs share the same genus. This means that 4.9% of *rps3* genes that align at 100% identity belong to different species under the same genus. From this table we conclude that the majority (~70% or more) of *rps3* genes that align at 99% or more belong to the same species and therefore use this number as a threshold for species-based clustering. Similarly, >70% of pairs that align at 88% identity or more belong to the same genus.

|            | 4 m     |       | 5 m     |       | 6 m     |       |
|------------|---------|-------|---------|-------|---------|-------|
| % identity | Species | Genus | Species | Genus | Species | Genus |
| 100.0      | 95.1    | 100.0 | 96.1    | 100.0 | 92.6    | 100.0 |
| 99.0       | 77.5    | 100.0 | 81.3    | 100.0 | 68.9    | 100.0 |
| 98.0       | 50.5    | 100.0 | 56.3    | 100.0 | 39.7    | 100.0 |
| 97.0       | 61.2    | 91.3  | 67.4    | 93.5  | 51.8    | 91.2  |
| 96.0       | 38.4    | 100.0 | 44.1    | 100.0 | 28.7    | 100.0 |
| 95.0       | 0.0     | 100.0 | 0.0     | 100.0 | 0.0     | 100.0 |
| 94.0       | 22.8    | 79.7  | 28.0    | 83.3  | 16.9    | 82.1  |
| 93.0       | 0.0     | 100.0 | 0.0     | 100.0 | 0.0     | 100.0 |
| 92.0       | 27.7    | 100.0 | 32.6    | 100.0 | 19.8    | 100.0 |
| 91.0       | 11.2    | 100.0 | 13.8    | 100.0 | 7.6     | 100.0 |
| 90.0       | 0.0     | 83.6  | 0.0     | 85.7  | 0.0     | 86.9  |
| 89.0       | 0.0     | 70.6  | 0.0     | 73.9  | 0.0     | 75.7  |
| 88.0       | 0.0     | 70.6  | 0.0     | 73.9  | 0.0     | 75.7  |
| 87.0       | 0.0     | 43.9  | 0.0     | 48.1  | 0.0     | 50.4  |
| 86.0       | 0.0     | 61.7  | 0.0     | 65.6  | 0.0     | 67.7  |
| 85.0       | 0.0     | 53.8  | 0.0     | 57.9  | 0.0     | 60.2  |
| 84.0       | 18.6    | 64.9  | 23.6    | 70.1  | 14.1    | 68.4  |

## Estimating a lower bound for the number of species in the samples

Our sequencing efforts were far from being exhaustive, as indicated by the relatively low rates of both long and short reads going into assemblies. *rpS3*-based rarefaction curves for the three samples (**Fig. S16**) provided showed that our sequencing efforts are indeed far from being sufficient. In order to get a general sense of how complex our samples are we tried to put a lower bound on the number of most abundant species which we were able to sample. In other words, we were trying to answer the following question: assuming that all species in the sample are sorted by their rank (as in a rank abundance curve), what would be the rank of the least abundant species we were able to sample?

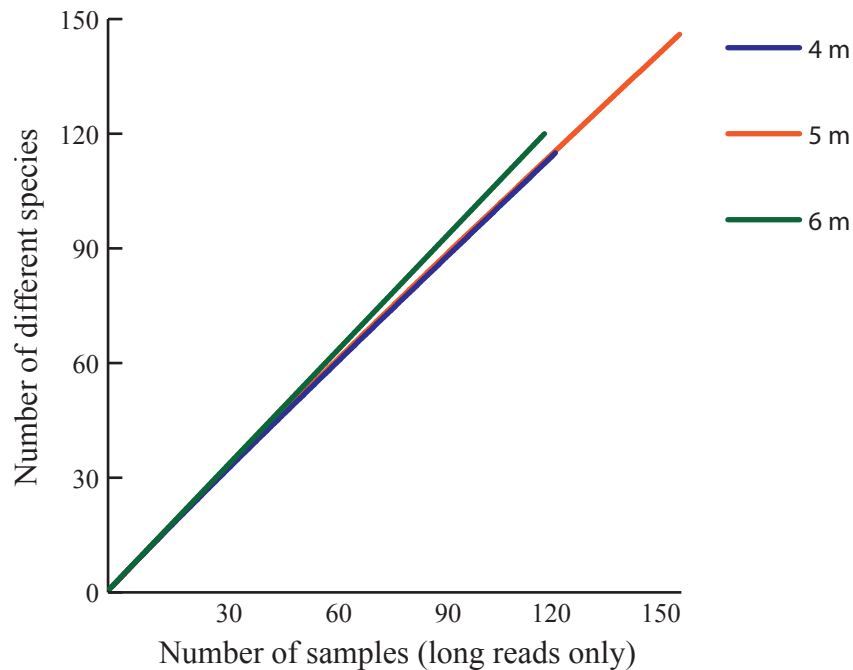

**Figure S16:** rarefaction curves for the three samples based on *rpS3* genes found on synthetic long reads only. For the 6 m sample each species was detected exactly once. Illumina assembled *rpS3* genes were not used because they represent only the fraction of community that is abundant enough.

To answer this question we “divided” the population into two fractions based on a coverage threshold and estimated a lower bound on the number of species in each. The threshold that was chosen is 2x because this is about the coverage in which short reads start to assemble. We estimated a lower bound on the number of species as follows:

1. Count the number of species with coverage  $> 2x$  from both the short-read assemblies and synthetic long reads, based on *rpS3* clustering (we will denote this number  $N^{>2}$ ). We assume that for the  $> 2x$  the combination of short- and long-read datasets provide a good approximation for community structure because the short-read data is expected to be assembled for species represented by single strains and the long-read data is expected to uncover multi-strain species (at least the abundant ones). In any case the number computed here is not expected to exceed the true number.

The following steps are taken to determine  $N^{\leq 2}$ , an upper bound on the number of species with coverage  $\leq 2x$ .

2. Summarize the coverage for species with coverage  $> 2x$  based on the coverage of *rpS3* genes from both the short-read assemblies and synthetic long-reads.
3. Use the fraction of short reads that mapped to single copy genes from synthetic long-reads with coverage  $> 2x$  as an estimator for the portion of the community occupied by these organisms. (complementary frequencies to the gray bars in **Fig. S18**). Both long and short **reads** are assumed to be sampled randomly with equal probability from the entire community regardless of genome abundance and could therefore be used for this purpose (unlike the **assembled** short-read sequences that represent only genomes with sufficient coverage).
4. Compute the relative abundance of the least abundant species with  $> 2x$  coverage by dividing the coverage of the least abundant species with coverage  $> 2x$  by the sum of coverages for all species with coverage  $> 2x$  (computed in (2)) and normalizing this value by the share of these species in the community (from (3)).
5. The relative abundance of any of the species with coverage  $\leq 2x$  will be smaller than the relative abundance computed in (4). Dividing the relative frequency of species with  $\leq 2x$  by the relative abundance of the least abundant species from the  $> 2x$  group will therefore give us a lower bound on the number of species in this fraction. We will denote this number by  $N^{\leq 2x}$ .
6. The total number of species in the “pool” of species that were sampled is given by  $N = N^{> 2x} + N^{\leq 2x}$ .

The calculated lower bounds on the number of species in the 3 samples were around 900 for the 4 and 6 m samples and around 3,000 for the 5 m samples. We estimate that the true numbers are significantly higher because dozens of species with less than 2x coverage were detected in each of the samples, suggesting that the lowest relative abundance in the  $> 2x$  fraction is in fact a very strict estimator.

### Internal controls on contamination

In order to identify potential contamination in our datasets we used two different approaches. First, we aligned (using BLAST) the long reads against an extended version of the uniref90 database (refer to **Fig. S17** for a summary of the taxonomic profiling for the three samples). The extended version of uniref90 includes also other genomes recovered from Rifle. Using this analysis it is possible to identify DNA that is clearly foreign to the samples. Second, we manually checked the data using the ggKBase platform and other tools in order to search for suspicious DNA. This approach proved to be efficient in the past in identifying contaminations. For the current study we identified a few dozen reads (out of several tens of thousands) that originated from a cloning vector, as well as a few dozens identical long reads that seemed to be an artifact of the sequencing process. The vast majority of the data, however, appears to be reliable

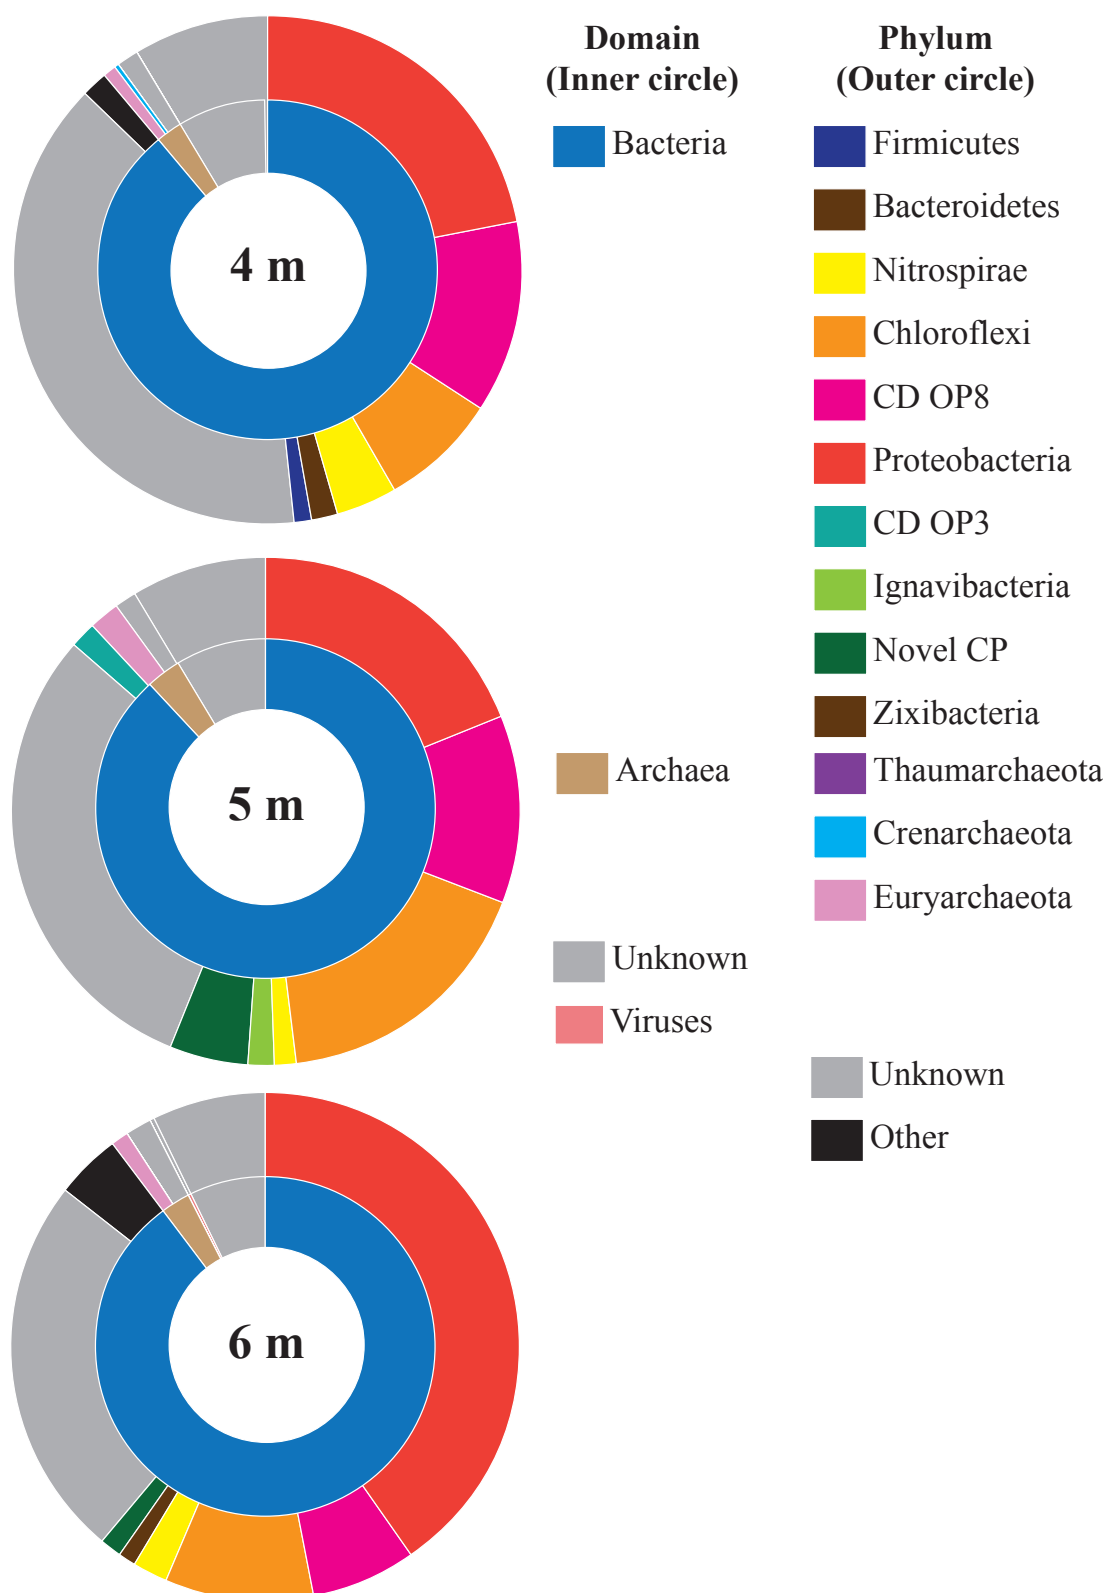

**Figure S17:** Distribution of domains and phyla of best hits for predicted proteins on assembled and unassembled synthetic long-reads.

**Table S7:** Statistics of 51 marker gene families in the 4 m sample. Expected, observed columns: expected (based on 37.9 % of bps) and observed number of proteins on  $\leq 2x$  coverage reads.

|                                            | <b>Total</b> | <b>Expected</b> | <b>Observed</b> | <b>Observed freq</b> | <b>p-value</b> |
|--------------------------------------------|--------------|-----------------|-----------------|----------------------|----------------|
| <b>Total</b>                               | 5603         | 1939            | 1751            | 0.31                 | 1.0000         |
| <b>Histidyl-tRNA synthetase</b>            | 136          | 51.5            | 47              | 0.35                 | 0.7615         |
| <b>Phenylalanyl-tRNA synthetase alpha</b>  | 85           | 32.2            | 36              | 0.42                 | 0.1688         |
| <b>Preprotein translocase subunit SecY</b> | 134          | 50.7            | 46              | 0.34                 | 0.7764         |
| <b>Valyl-tRNA synthetase</b>               | 120          | 45.4            | 47              | 0.39                 | 0.3496         |
| <b>alanyl tRNA synthetase</b>              | 106          | 40.1            | 43              | 0.41                 | 0.2514         |
| <b>arginyl tRNA synthetase</b>             | 70           | 26.5            | 36              | 0.51                 | 0.0077         |
| <b>aspartyl tRNA synthetase</b>            | 100          | 37.9            | 37              | 0.37                 | 0.5295         |
| <i>gyrA</i>                                | 115          | 43.5            | 42              | 0.37                 | 0.5796         |
| <b>leucyl-tRNA synthetase</b>              | 106          | 40.1            | 37              | 0.35                 | 0.7017         |
| <i>recA</i>                                | 129          | 48.8            | 46              | 0.36                 | 0.6656         |
| <b>ribosomal protein L1</b>                | 100          | 37.9            | 22              | 0.22                 | 0.9995         |
| <b>ribosomal protein L10</b>               | 89           | 33.7            | 24              | 0.27                 | 0.9799         |
| <b>ribosomal protein L11</b>               | 119          | 45.1            | 30              | 0.25                 | 0.9977         |
| <b>ribosomal protein L13</b>               | 113          | 42.8            | 35              | 0.31                 | 0.9237         |
| <b>ribosomal protein L14</b>               | 117          | 44.3            | 35              | 0.30                 | 0.9557         |
| <b>ribosomal protein L15</b>               | 119          | 45.1            | 32              | 0.27                 | 0.9924         |
| <b>ribosomal protein L16-L10E</b>          | 106          | 40.1            | 31              | 0.29                 | 0.9605         |
| <b>ribosomal protein L17</b>               | 116          | 43.9            | 41              | 0.35                 | 0.6791         |
| <b>ribosomal protein L18</b>               | 117          | 44.3            | 35              | 0.30                 | 0.9557         |
| <b>ribosomal protein L19</b>               | 87           | 32.9            | 36              | 0.41                 | 0.2169         |
| <b>ribosomal protein L2</b>                | 104          | 39.4            | 33              | 0.32                 | 0.8849         |
| <b>ribosomal protein L20</b>               | 104          | 39.4            | 39              | 0.38                 | 0.4900         |
| <b>ribosomal protein L21</b>               | 97           | 36.7            | 28              | 0.29                 | 0.9600         |
| <b>ribosomal protein L22</b>               | 99           | 37.5            | 31              | 0.31                 | 0.8949         |
| <b>ribosomal protein L23</b>               | 113          | 42.8            | 32              | 0.28                 | 0.9789         |
| <b>ribosomal protein L24</b>               | 107          | 40.5            | 27              | 0.25                 | 0.9961         |
| <b>ribosomal protein L27</b>               | 99           | 37.5            | 26              | 0.26                 | 0.9901         |
| <b>ribosomal protein L29</b>               | 109          | 41.3            | 29              | 0.27                 | 0.9913         |
| <b>ribosomal protein L3</b>                | 111          | 42              | 34              | 0.31                 | 0.9322         |
| <b>ribosomal protein L30</b>               | 91           | 34.4            | 23              | 0.25                 | 0.9924         |
| <b>ribosomal protein L4</b>                | 107          | 40.5            | 31              | 0.29                 | 0.9661         |
| <b>ribosomal protein L5</b>                | 105          | 39.7            | 31              | 0.30                 | 0.9541         |
| <b>ribosomal protein L6P-L9E</b>           | 125          | 47.3            | 36              | 0.29                 | 0.9790         |
| <b>ribosomal protein S10</b>               | 116          | 43.9            | 29              | 0.25                 | 0.9977         |
| <b>ribosomal protein S11</b>               | 131          | 49.6            | 36              | 0.27                 | 0.9920         |
| <b>ribosomal protein S12</b>               | 120          | 45.4            | 32              | 0.27                 | 0.9936         |
| <b>ribosomal protein S13</b>               | 139          | 52.6            | 40              | 0.29                 | 0.9846         |
| <b>ribosomal protein S15</b>               | 108          | 40.9            | 38              | 0.35                 | 0.6829         |
| <b>ribosomal protein S16</b>               | 87           | 32.9            | 26              | 0.30                 | 0.9253         |
| <b>ribosomal protein S17</b>               | 122          | 46.2            | 36              | 0.30                 | 0.9670         |
| <b>ribosomal protein S18</b>               | 90           | 34.1            | 26              | 0.29                 | 0.9528         |
| <b>ribosomal protein S19</b>               | 101          | 38.2            | 33              | 0.33                 | 0.8364         |
| <b>ribosomal protein S2</b>                | 91           | 34.4            | 27              | 0.30                 | 0.9362         |
| <b>ribosomal protein S20</b>               | 92           | 34.8            | 33              | 0.36                 | 0.6125         |
| <b>ribosomal protein S3</b>                | 97           | 36.7            | 30              | 0.31                 | 0.9063         |
| <b>ribosomal protein S4</b>                | 137          | 51.9            | 46              | 0.34                 | 0.8301         |
| <b>ribosomal protein S5</b>                | 137          | 51.9            | 40              | 0.29                 | 0.9792         |
| <b>ribosomal protein S6</b>                | 105          | 39.7            | 32              | 0.30                 | 0.9304         |
| <b>ribosomal protein S7</b>                | 139          | 52.6            | 41              | 0.29                 | 0.9761         |
| <b>ribosomal protein S8</b>                | 118          | 44.7            | 35              | 0.30                 | 0.9616         |
| <b>ribosomal protein S9</b>                | 118          | 44.7            | 33              | 0.28                 | 0.9848         |

**Table S8:** Statistics of 51 marker gene families in the 5 m sample. Expected, observed columns: expected (based on 34.6 % of bps) and observed number of proteins on  $\leq 2x$  coverage reads.

|                                            | <b>Total</b> | <b>Expected</b> | <b>Observed</b> | <b>Observed freq</b> | <b>p-value</b> |
|--------------------------------------------|--------------|-----------------|-----------------|----------------------|----------------|
| <b>Total</b>                               | 5852         | 2025            | 1827            | 0.31                 | 1.0000         |
| <b>Histidyl-tRNA synthetase</b>            | 134          | 46.3            | 42              | 0.31                 | 0.7570         |
| <b>Phenylalanyl-tRNA synthetase alpha</b>  | 118          | 40.8            | 40              | 0.34                 | 0.5213         |
| <b>Preprotein translocase subunit SecY</b> | 107          | 37              | 29              | 0.27                 | 0.9389         |
| <b>Valyl-tRNA synthetase</b>               | 151          | 52.2            | 49              | 0.32                 | 0.6782         |
| <b>alanyl tRNA synthetase</b>              | 103          | 35.6            | 37              | 0.36                 | 0.3466         |
| <b>arginyl tRNA synthetase</b>             | 92           | 31.8            | 30              | 0.33                 | 0.6108         |
| <b>aspartyl tRNA synthetase</b>            | 105          | 36.3            | 39              | 0.37                 | 0.2559         |
| <i>gyrA</i>                                | 135          | 46.7            | 51              | 0.38                 | 0.1924         |
| <b>leucyl-tRNA synthetase</b>              | 103          | 35.6            | 35              | 0.34                 | 0.5071         |
| <i>recA</i>                                | 118          | 40.8            | 45              | 0.38                 | 0.1825         |
| <b>ribosomal protein L1</b>                | 91           | 31.4            | 28              | 0.31                 | 0.7425         |
| <b>ribosomal protein L10</b>               | 127          | 43.9            | 44              | 0.35                 | 0.4548         |
| <b>ribosomal protein L11</b>               | 127          | 43.9            | 50              | 0.39                 | 0.1114         |
| <b>ribosomal protein L13</b>               | 83           | 28.7            | 24              | 0.29                 | 0.8347         |
| <b>ribosomal protein L14</b>               | 149          | 51.5            | 46              | 0.31                 | 0.8073         |
| <b>ribosomal protein L15</b>               | 105          | 36.3            | 33              | 0.31                 | 0.7168         |
| <b>ribosomal protein L16-L10E</b>          | 139          | 48              | 44              | 0.32                 | 0.7373         |
| <b>ribosomal protein L17</b>               | 57           | 19.7            | 21              | 0.37                 | 0.3066         |
| <b>ribosomal protein L18</b>               | 113          | 39              | 36              | 0.32                 | 0.6936         |
| <b>ribosomal protein L19</b>               | 84           | 29              | 37              | 0.44                 | 0.0281         |
| <b>ribosomal protein L2</b>                | 142          | 49.1            | 40              | 0.28                 | 0.9378         |
| <b>ribosomal protein L20</b>               | 115          | 39.7            | 34              | 0.30                 | 0.8504         |
| <b>ribosomal protein L21</b>               | 95           | 32.8            | 37              | 0.39                 | 0.1589         |
| <b>ribosomal protein L22</b>               | 111          | 38.4            | 28              | 0.25                 | 0.9780         |
| <b>ribosomal protein L23</b>               | 160          | 55.3            | 42              | 0.26                 | 0.9851         |
| <b>ribosomal protein L24</b>               | 139          | 48              | 44              | 0.32                 | 0.7373         |
| <b>ribosomal protein L27</b>               | 87           | 30.1            | 37              | 0.43                 | 0.0494         |
| <b>ribosomal protein L29</b>               | 108          | 37.3            | 22              | 0.20                 | 0.9991         |
| <b>ribosomal protein L3</b>                | 142          | 49.1            | 39              | 0.27                 | 0.9572         |
| <b>ribosomal protein L30</b>               | 67           | 23.1            | 16              | 0.24                 | 0.9598         |
| <b>ribosomal protein L4</b>                | 138          | 47.7            | 36              | 0.26                 | 0.9797         |
| <b>ribosomal protein L5</b>                | 134          | 46.3            | 41              | 0.31                 | 0.8109         |
| <b>ribosomal protein L6P-L9E</b>           | 136          | 47              | 40              | 0.29                 | 0.8822         |
| <b>ribosomal protein S10</b>               | 163          | 56.3            | 46              | 0.28                 | 0.9501         |
| <b>ribosomal protein S11</b>               | 89           | 30.7            | 25              | 0.28                 | 0.8820         |
| <b>ribosomal protein S12</b>               | 143          | 49.4            | 39              | 0.27                 | 0.9622         |
| <b>ribosomal protein S13</b>               | 110          | 38              | 31              | 0.28                 | 0.9072         |
| <b>ribosomal protein S15</b>               | 94           | 32.5            | 31              | 0.33                 | 0.5836         |
| <b>ribosomal protein S16</b>               | 83           | 28.7            | 30              | 0.36                 | 0.3370         |
| <b>ribosomal protein S17</b>               | 146          | 50.5            | 42              | 0.29                 | 0.9199         |
| <b>ribosomal protein S18</b>               | 68           | 23.5            | 21              | 0.31                 | 0.6938         |
| <b>ribosomal protein S19</b>               | 131          | 45.3            | 35              | 0.27                 | 0.9664         |
| <b>ribosomal protein S2</b>                | 111          | 38.4            | 39              | 0.35                 | 0.4099         |
| <b>ribosomal protein S20</b>               | 88           | 30.4            | 30              | 0.34                 | 0.4907         |
| <b>ribosomal protein S3</b>                | 133          | 46              | 41              | 0.31                 | 0.7940         |
| <b>ribosomal protein S4</b>                | 94           | 32.5            | 25              | 0.27                 | 0.9383         |
| <b>ribosomal protein S5</b>                | 133          | 46              | 39              | 0.29                 | 0.8835         |
| <b>ribosomal protein S6</b>                | 61           | 21.1            | 25              | 0.41                 | 0.1193         |
| <b>ribosomal protein S7</b>                | 154          | 53.2            | 41              | 0.27                 | 0.9787         |
| <b>ribosomal protein S8</b>                | 142          | 49.1            | 43              | 0.30                 | 0.8398         |
| <b>ribosomal protein S9</b>                | 94           | 32.5            | 28              | 0.30                 | 0.8078         |



**Table S9:** Statistics of 51 marker gene families in the 6 m sample. Expected, observed columns: expected (based on 59.5 % of bps) and observed number of proteins on  $\leq 2x$  coverage reads.

|                                            | <b>Total</b> | <b>Expected</b> | <b>Observed</b> | <b>Observed freq</b> | <b>p-value</b> |
|--------------------------------------------|--------------|-----------------|-----------------|----------------------|----------------|
| <b>Total</b>                               | 5125         | 3049.375        | 2486            | 0.49                 | 1.0000         |
| <b>Histidyl-tRNA synthetase</b>            | 111          | 66.2            | 61              | 0.55                 | 0.8106         |
| <b>Phenylalanyl-tRNA synthetase alpha</b>  | 100          | 59.7            | 57              | 0.57                 | 0.6600         |
| <b>Preprotein translocase subunit SecY</b> | 103          | 61.4            | 52              | 0.50                 | 0.9602         |
| <b>Valyl-tRNA synthetase</b>               | 108          | 64.4            | 63              | 0.58                 | 0.5616         |
| <b>alanyl tRNA synthetase</b>              | 91           | 54.3            | 49              | 0.54                 | 0.8394         |
| <b>arginyl tRNA synthetase</b>             | 75           | 44.7            | 44              | 0.59                 | 0.5147         |
| <b>aspartyl tRNA synthetase</b>            | 101          | 60.2            | 58              | 0.57                 | 0.6289         |
| <i>gyrA</i>                                | 123          | 73.4            | 73              | 0.59                 | 0.4793         |
| <b>leucyl-tRNA synthetase</b>              | 98           | 58.5            | 49              | 0.50                 | 0.9642         |
| <i>recA</i>                                | 125          | 74.6            | 65              | 0.52                 | 0.9463         |
| <b>ribosomal protein L1</b>                | 87           | 51.9            | 38              | 0.44                 | 0.9979         |
| <b>ribosomal protein L10</b>               | 109          | 65              | 49              | 0.45                 | 0.9985         |
| <b>ribosomal protein L11</b>               | 116          | 69.2            | 54              | 0.47                 | 0.9967         |
| <b>ribosomal protein L13</b>               | 100          | 59.7            | 58              | 0.58                 | 0.5831         |
| <b>ribosomal protein L14</b>               | 108          | 64.4            | 43              | 0.40                 | 1.0000         |
| <b>ribosomal protein L15</b>               | 98           | 58.5            | 48              | 0.49                 | 0.9775         |
| <b>ribosomal protein L16-L10E</b>          | 103          | 61.4            | 41              | 0.40                 | 1.0000         |
| <b>ribosomal protein L17</b>               | 50           | 29.8            | 31              | 0.62                 | 0.3097         |
| <b>ribosomal protein L18</b>               | 96           | 57.3            | 42              | 0.44                 | 0.9987         |
| <b>ribosomal protein L19</b>               | 108          | 64.4            | 52              | 0.48                 | 0.9889         |
| <b>ribosomal protein L2</b>                | 116          | 69.2            | 46              | 0.40                 | 1.0000         |
| <b>ribosomal protein L20</b>               | 101          | 60.2            | 61              | 0.60                 | 0.3903         |
| <b>ribosomal protein L21</b>               | 71           | 42.3            | 38              | 0.54                 | 0.8177         |
| <b>ribosomal protein L22</b>               | 111          | 66.2            | 40              | 0.36                 | 1.0000         |
| <b>ribosomal protein L23</b>               | 125          | 74.6            | 49              | 0.39                 | 1.0000         |
| <b>ribosomal protein L24</b>               | 98           | 58.5            | 39              | 0.40                 | 0.9999         |
| <b>ribosomal protein L27</b>               | 71           | 42.3            | 40              | 0.56                 | 0.6656         |
| <b>ribosomal protein L29</b>               | 93           | 55.5            | 37              | 0.40                 | 0.9999         |
| <b>ribosomal protein L3</b>                | 108          | 64.4            | 47              | 0.44                 | 0.9994         |
| <b>ribosomal protein L30</b>               | 82           | 48.9            | 36              | 0.44                 | 0.9969         |
| <b>ribosomal protein L4</b>                | 115          | 68.6            | 47              | 0.41                 | 1.0000         |
| <b>ribosomal protein L5</b>                | 101          | 60.2            | 42              | 0.42                 | 0.9998         |
| <b>ribosomal protein L6P-L9E</b>           | 110          | 65.6            | 49              | 0.45                 | 0.9989         |
| <b>ribosomal protein S10</b>               | 108          | 64.4            | 44              | 0.41                 | 0.9999         |
| <b>ribosomal protein S11</b>               | 96           | 57.3            | 52              | 0.54                 | 0.8317         |
| <b>ribosomal protein S12</b>               | 94           | 56.1            | 51              | 0.54                 | 0.8242         |
| <b>ribosomal protein S13</b>               | 99           | 59.1            | 51              | 0.52                 | 0.9344         |
| <b>ribosomal protein S15</b>               | 80           | 47.7            | 48              | 0.60                 | 0.4216         |
| <b>ribosomal protein S16</b>               | 79           | 47.1            | 38              | 0.48                 | 0.9735         |
| <b>ribosomal protein S17</b>               | 115          | 68.6            | 45              | 0.39                 | 1.0000         |
| <b>ribosomal protein S18</b>               | 76           | 45.3            | 45              | 0.59                 | 0.4769         |
| <b>ribosomal protein S19</b>               | 114          | 68              | 44              | 0.39                 | 1.0000         |
| <b>ribosomal protein S2</b>                | 102          | 60.8            | 58              | 0.57                 | 0.6724         |
| <b>ribosomal protein S20</b>               | 92           | 54.9            | 47              | 0.51                 | 0.9371         |
| <b>ribosomal protein S3</b>                | 108          | 64.4            | 39              | 0.36                 | 1.0000         |
| <b>ribosomal protein S4</b>                | 109          | 65              | 64              | 0.59                 | 0.5300         |
| <b>ribosomal protein S5</b>                | 114          | 68              | 53              | 0.46                 | 0.9966         |
| <b>ribosomal protein S6</b>                | 96           | 57.3            | 49              | 0.51                 | 0.9426         |
| <b>ribosomal protein S7</b>                | 118          | 70.4            | 55              | 0.47                 | 0.9969         |
| <b>ribosomal protein S8</b>                | 108          | 64.4            | 45              | 0.42                 | 0.9999         |
| <b>ribosomal protein S9</b>                | 105          | 62.6            | 60              | 0.57                 | 0.6546         |

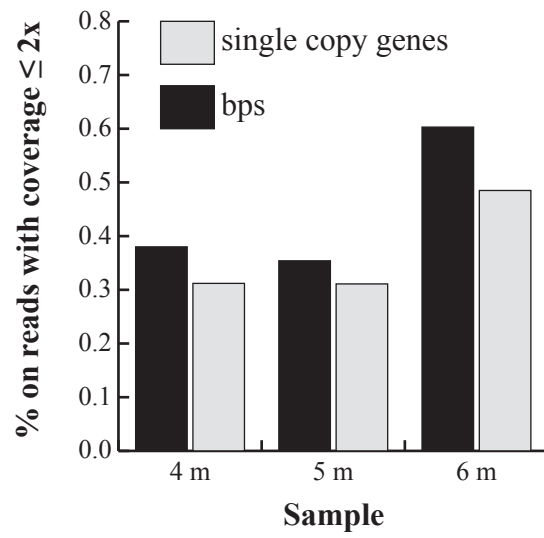

**Figure S18:** fraction of single copy genes (gray) and base-pairs on synthetic long-reads  $\geq 5$  kbp with  $\leq 2x$  coverage. Fraction of single copy genes can be used as a proxy for the fraction of cells represented in the two sets.

**Table S10:** protein MCL clusters significantly more abundant on synthetic long-reads with  $\leq 2x$  coverage, 4 m sample. Bonferroni correction was applied to adjust the 0.05 p-value threshold (adjusted p-value is 1.7e-5).

| Family | Annotation                                                                                  | Total | Expected | Observed | Observed freq | p-value |
|--------|---------------------------------------------------------------------------------------------|-------|----------|----------|---------------|---------|
| 1248   | Prepilin-type N-terminal cleavage/methylation domain-containing protein                     | 40    | 15       | 39       | 0.98          | 0       |
| 39     | Oxidoreductase                                                                              | 245   | 93       | 147      | 0.60          | 8.6E-12 |
| 1982   | Hypothetical                                                                                | 26    | 10       | 25       | 0.96          | 1.1E-11 |
| 1463   | Hypothetical                                                                                | 34    | 13       | 30       | 0.88          | 1.3E-10 |
| 98     | LacI family transcriptional regulator                                                       | 175   | 66       | 105      | 0.60          | 1.1E-09 |
| 88     | Uroporphyrinogen-III decarboxylase                                                          | 163   | 62       | 98       | 0.60          | 3.0E-09 |
| 18     | Aminotransferase DegT/DnrJ/EryC1/StrS aminotransferase                                      | 404   | 153      | 209      | 0.52          | 6.3E-09 |
| 745    | Tetratricopeptide repeat protein (a structural motif, does not say much about the function) | 62    | 24       | 43       | 0.69          | 1.3E-07 |
| 2509   | ABC transporter substrate binding protein                                                   | 23    | 9        | 20       | 0.87          | 1.5E-07 |
| 1101   | Glycoside hydrolase family 4                                                                | 46    | 17       | 33       | 0.72          | 7.6E-07 |
| 43     | ABC transporter                                                                             | 240   | 91       | 126      | 0.53          | 1.6E-06 |
| 37     | Glycosyl transferase family 1                                                               | 256   | 97       | 133      | 0.52          | 1.9E-06 |
| 2622   | Transposase                                                                                 | 20    | 8        | 17       | 0.85          | 2.0E-06 |
| 1427   | Sulfatase                                                                                   | 36    | 14       | 26       | 0.72          | 6.7E-06 |
| 654    | Glycosyl transferase group 1                                                                | 68    | 26       | 43       | 0.63          | 6.9E-06 |
| 90     | Oxidoreductase                                                                              | 170   | 65       | 91       | 0.54          | 1.3E-05 |

**Table S11:** protein MCL clusters significantly more abundant on synthetic long-reads with  $\leq 2x$  coverage, 5 m sample. Bonferroni correction was applied to adjust the 0.05 p-value (adjusted p-value is 1.8e-5).

| Family | Annotation                                                             | Total | Expected | Observed | Observed freq | p-value |
|--------|------------------------------------------------------------------------|-------|----------|----------|---------------|---------|
| 2105   | TonB-dependent receptor                                                | 24    | 9        | 21       | 0.88          | 8.9E-09 |
| 625    | Hypothetical                                                           | 67    | 24       | 44       | 0.66          | 5.7E-08 |
| 672    | Mandelate racemase                                                     | 64    | 23       | 41       | 0.64          | 4.2E-07 |
| 2555   | Von Willebrand factor type A                                           | 20    | 7        | 17       | 0.85          | 4.3E-07 |
| 375    | Oxidoreductase                                                         | 88    | 31       | 52       | 0.59          | 8.3E-07 |
| 1861   | Hypothetical                                                           | 29    | 10       | 22       | 0.76          | 1.1E-06 |
| 1563   | N-acetyltransferase GCN5                                               | 30    | 11       | 22       | 0.73          | 3.1E-06 |
| 1175   | Hypothetical/membrane protein                                          | 40    | 14       | 27       | 0.68          | 5.4E-06 |
| 776    | Coenzyme F390 synthetase/ Capsular polysaccharide biosynthesis protein | 59    | 20       | 36       | 0.61          | 9.9E-06 |
| 399    | Oxidoreductase                                                         | 87    | 30       | 49       | 0.56          | 1.1E-05 |
| 1249   | Uncharacterized                                                        | 39    | 14       | 26       | 0.67          | 1.1E-05 |

**Table S12:** protein MCL clusters significantly more abundant on synthetic long-reads with  $\leq 2x$  coverage, 6 m sample. Bonferroni correction was applied to adjust the 0.05 p-value (adjusted p-value is  $2.1e-5$ ).

| Family | Annotation                                           | Total | Expected | Observed | Observed freq | p-value |
|--------|------------------------------------------------------|-------|----------|----------|---------------|---------|
| 866    | Permease                                             | 49    | 29       | 49       | 1.00          | 0       |
| 2157   | ABC-type Fe <sup>3+</sup> transport system           | 21    | 13       | 21       | 1.00          | 0       |
| 2252   | Uncharacterized                                      | 20    | 12       | 20       | 1.00          | 0       |
| 1724   | Outer membrane receptor                              | 26    | 15       | 26       | 1.00          | 0       |
| 1796   | RNA polymerase, sigma subunit, ECF family            | 25    | 15       | 25       | 1.00          | 0       |
| 101    | Oxidoreductase                                       | 128   | 76       | 114      | 0.89          | 2.5E-14 |
| 911    | Sulfatase                                            | 47    | 28       | 45       | 0.96          | 8.3E-10 |
| 130    | Oxidoreductase                                       | 117   | 70       | 98       | 0.84          | 4.0E-09 |
| 383    | Mandelate racemase                                   | 81    | 48       | 71       | 0.88          | 5.4E-09 |
| 1268   | Sulfatase                                            | 36    | 21       | 35       | 0.97          | 7.6E-09 |
| 204    | MmgE/PrpD family protein                             | 98    | 58       | 83       | 0.85          | 1.6E-08 |
| 1386   | Prepilin-type N-terminal Cleavage/methylation domain | 34    | 20       | 33       | 0.97          | 2.2E-08 |
| 1121   | Lyase                                                | 40    | 24.1     | 37       | 0.93          | 6.0E-07 |
| 1026   | Oxidoreductase                                       | 42    | 25.3     | 38       | 0.90          | 2.2E-06 |
| 601    | Phage integrase                                      | 61    | 36.8     | 52       | 0.85          | 5.3E-06 |
| 54     | Glycosyl transferase family 1                        | 178   | 107.3    | 134      | 0.75          | 8.9E-06 |
| 1159   | PadR family transcriptional regulator                | 39    | 23.5     | 35       | 0.90          | 8.0E-06 |
| 21     | Transporter related binding/receptot protein         | 293   | 175      | 210      | 0.72          | 5.5E-06 |
| 2      | Reductase                                            | 1096  | 653      | 722      | 0.66          | 6.1E-06 |
| 1943   | Pyrrolo-quinoline quinone                            | 23    | 13.9     | 22       | 0.96          | 8.9E-06 |
| 1668   | Transporter                                          | 27    | 16       | 25       | 0.93          | 1.6E-05 |
| 137    | Asparagine synthetase                                | 115   | 69       | 89       | 0.77          | 1.6E-05 |

**Table S13:** protein families with more than 1,000 members, 4 m sample.

| Family | Annotation                          | Total | Expected | Observed | Observed freq | p-value |
|--------|-------------------------------------|-------|----------|----------|---------------|---------|
| 1      | ABC transporter ATP-binding protein | 1811  | 697.2    | 503      | 0.27          | 1       |
| 2      | Dehydrogenase                       | 1327  | 510.9    | 481      | 0.36          | 0.95    |
| 3      | ABC transporter ATP-binding protein | 1073  | 413.1    | 380      | 0.35          | 0.98    |

**Table S14:** protein families with more than 1,000 members, 5 m sample.

| Family | Annotation                          | Total | Expected | Observed | Observed freq | p-value |
|--------|-------------------------------------|-------|----------|----------|---------------|---------|
| 1      | ABC transporter ATP-binding protein | 1580  | 548      | 427      | 0.27          | 1.0000  |
| 2      | Dehydrogenase                       | 1186  | 411      | 456      | 0.38          | 0.0026  |
| 3      | ABC transporter ATP-binding protein | 1098  | 381      | 321      | 0.29          | 0.9999  |

**Table S15:** protein families with more than 1,000 members, 6 m sample.

| Family | Annotation                          | Total | Expected | Observed | Observed freq | p-value |
|--------|-------------------------------------|-------|----------|----------|---------------|---------|
| 1      | ABC transporter ATP-binding protein | 1167  | 695      | 601      | 0.51          | 1.0000  |
| 2      | Dehydrogenase                       | 1096  | 653      | 722      | 0.66          | 6.1E-06 |
| 3      | ABC transporter ATP-binding protein | 1049  | 625      | 581      | 0.55          | 0.9962  |

**Table S16:** Enriched KEGG-terms in synthetic long-reads with  $\leq 2x$  coverage, 4 m sample. Bonferroni correction was applied to adjust the 0.05 p-value threshold (adjusted p-value is  $3.8e-5$ ).

| KEGG-term | Annotation                                       | Total | Expected | Observed | Observed freq | p-value |
|-----------|--------------------------------------------------|-------|----------|----------|---------------|---------|
| K07406    | alpha-galactosidase [EC:3.2.1.22]                | 49    | 18.5     | 36       | 0.73          | 9.6E-08 |
| K01599    | uroporphyrinogen decarboxylase [EC:4.1.1.37]     | 345   | 130.7    | 177      | 0.51          | 1.6E-07 |
| K02025    | multiple sugar transport system permease protein | 251   | 95.1     | 133      | 0.52          | 4.6E-07 |
| K02392    | flagellar basal-body rod protein FlgG            | 29    | 10.9     | 22       | 0.75          | 6.5E-06 |
| K02026    | multiple sugar transport system permease protein | 259   | 98.1     | 131      | 0.5           | 1.3E-05 |

**Table S17:** enriched KEGG-terms in synthetic long-reads with  $\leq 2x$  coverage, 5 m sample. Bonferroni correction was applied to adjust the 0.05 p-value threshold (adjusted p-value is  $3.7e-5$ ).

| KEGG-term | Annotation                                       | Total | Expected | Observed | Observed freq | p-value |
|-----------|--------------------------------------------------|-------|----------|----------|---------------|---------|
| K07406    | alpha-galactosidase [EC:3.2.1.22]                | 49    | 18.5     | 36       | 0.73          | 9.6E-08 |
| K01599    | uroporphyrinogen decarboxylase [EC:4.1.1.37]     | 345   | 130.7    | 177      | 0.51          | 1.6E-07 |
| K02025    | multiple sugar transport system permease protein | 251   | 95.1     | 133      | 0.52          | 4.6E-07 |
| K02392    | flagellar basal-body rod protein FlgG            | 29    | 10.9     | 22       | 0.75          | 6.5E-06 |
| K02026    | multiple sugar transport system permease protein | 259   | 98.1     | 131      | 0.5           | 1.3E-05 |

**Table S18:** enriched KEGG-terms in synthetic long-reads with  $\leq 2x$  coverage, 6 m sample. Bonferroni correction was applied to adjust the 0.05 p-value threshold (adjusted p-value is  $3.8e-5$ ).

| KEGG-term | Annotation                                                        | Total | Expected | Observed | Observed freq | p-value |
|-----------|-------------------------------------------------------------------|-------|----------|----------|---------------|---------|
| K07812    | trimethylamine-N-oxide reductase (cytochrome c) 2 [EC:1.7.2.3]    | 47    | 27.9     | 43       | 0.91          | 1.4E-07 |
| K01953    | asparagine synthase (glutamine-hydrolysing) [EC:6.3.5.4]          | 166   | 98.7     | 126      | 0.75          | 2.9E-06 |
| K07031    | D-glycero-alpha-D-manno-heptose-7-phosphate kinase [EC:2.7.1.168] | 48    | 28.5     | 41       | 0.85          | 2.3E-05 |
| K02026    | multiple sugar transport system permease protein                  | 264   | 157      | 188      | 0.71          | 2.9E-05 |

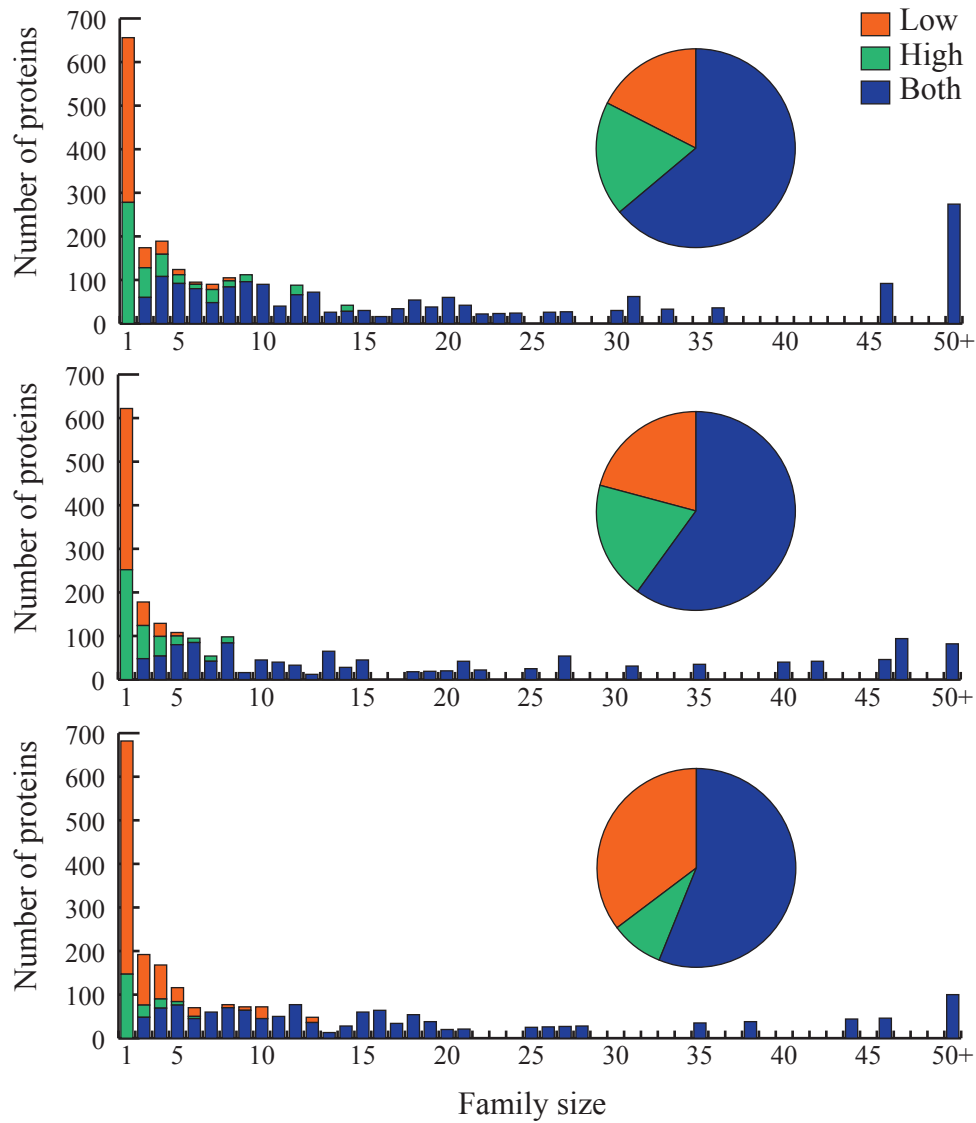

**Figure S19:** Total number of proteins in glycosyl hydrolase families of different sizes. Families with representatives in low ( $\leq 2x$  coverage), high ( $> 2x$  coverage) and both scaffolds are reported. Number of families that are unique to low coverage scaffolds (418, 409 and 637 for the 4, 5 and 6 m samples, respectively) was higher than the number of families unique to high coverage scaffolds (348, 316, 141) and the number of families common to both fractions (198, 140, 153); however most of the families that are unique to one of the coverage fractions are singletons.

**Table S19:** list of terms used for identifying glycosyl hydrolases in the ggKBase platform (refer to [http://ggkbase.berkeley.edu/custom\\_lists/5572-Glycosyl\\_hydrolase](http://ggkbase.berkeley.edu/custom_lists/5572-Glycosyl_hydrolase) for the implementation of the list in ggKBase).

|                             |                          |                                          |
|-----------------------------|--------------------------|------------------------------------------|
| cellobiosidase              | Dextranase               | acetylmuramidase                         |
| glycosidase                 | Polygalacturonase        | isomaltosidase                           |
| glycosyl                    | lysozyme                 | isomaltotriosidase                       |
| hydrolase                   | sialidase                | maltohexaosidase                         |
| endoglucanase               | fructofuranosidase       | mannobiosidase                           |
| glycoside hydrolase         | trehalase                | lactase                                  |
| cellulase                   | hyaluronoglucosaminidase | endogalactosaminidase                    |
| chitinase                   | arabinosidase            | maltotriohydrolase                       |
| 2.4.1.18                    | pullulanase              | EC:3.2.1                                 |
| glycogen debranching enzyme | glucosylceramidase       | polymannuronate hydrolase                |
| galacturonase               | galactosylceramidase     | octulosonidase                           |
| mannosidase                 | acetylglactosaminidase   | glucuronosidase                          |
| arabinase                   | acetylglucosaminidase    | chitosanase                              |
| glucuronidase               | acetylhexosaminidase     | maltohydrolase                           |
| xyloglucanase               | cyclomaltodextrinase     | difuctose-anhydride synthase             |
| xyloglycosyltransferase     | maltotetraohydrolase     | biosidase                                |
| mannanase                   | mycodextranase           | cellobiohydrolase                        |
| xylanase                    | glycosylceramidase       | alpha-neoagaro-oligosaccharide hydrolase |
| xylosidase                  | levanbiohydrolase        | glucosaminidase                          |
| arabinofuranosidase         | levanase                 | GlcNAcase                                |
| galactanase                 | quercitrinase            | mannosylglycerate hydrolase              |
| galactosidase               | galacturonidase          | rhamnogalacturonan hydrolase             |
| glucoronidase               | licheninase              | rhamnogalacturonyl hydrolase             |
| rhamnosidase                | isoamylase               | galacturonohydrolase                     |
| fucosidase                  | iduronidase              | rhamnohydrolase                          |
| amylase                     | fructosidase             | xylohydrolase                            |
| glucosidase                 | agarase                  | porphyranase                             |
| glucanase                   | galacturonosidase        | glucuronyl hydrolase                     |
| Inulinase                   | carrageenase             | chondroitin disaccharide hydrolase       |



## References

1. Castelle CJ, Hug LA, Wrighton KC, Thomas BC, Williams KH, et al. (2013) Extraordinary phylogenetic diversity and metabolic versatility in aquifer sediment. *Nat Commun* 4: 2120.
2. Hug LA, Castelle CJ, Wrighton KC, Thomas BC, Sharon I, et al. (2013) Community genomic analyses constrain the distribution of metabolic traits across the Chloroflexi phylum and indicate roles in sediment carbon cycling. *Microbiome* 1: 22.
3. Voskoboynik A, Neff NF, Sahoo D, Newman AM, Pushkarev D, et al. (2013) The genome sequence of the colonial chordate, *Botryllus schlosseri*. *Elife* 2: e00569.
4. Kuleshov V, Xie D, Chen R, Pushkarev D, Ma Z, et al. (2014) Whole-genome haplotyping using long reads and statistical methods. *Nat Biotechnol*.
5. McCoy RC, Taylor RW, Blauwkamp TA, Kelley JL, Kertesz M, et al. (2014) Illumina TruSeq synthetic long-reads empower de novo assembly and resolve complex, highly repetitive transposable elements. *BioRxivorg*.
6. Peng Y, Leung HC, Yiu SM, Chin FY (2012) IDBA-UD: a de novo assembler for single-cell and metagenomic sequencing data with highly uneven depth. *Bioinformatics* 28: 1420-1428.
7. Needleman SB, Wunsch CD (1970) A general method applicable to the search for similarities in the amino acid sequence of two proteins. *J Mol Biol* 48: 443-453.
8. Smith TF, Waterman MS (1981) Identification of common molecular subsequences. *J Mol Biol* 147: 195-197.
9. Sharon I, Morowitz MJ, Thomas BC, Costello EK, Relman DA, et al. (2013) Time series community genomics analysis reveals rapid shifts in bacterial species, strains, and phage during infant gut colonization. *Genome Res* 23: 111-120.
10. Hyatt D, Chen GL, Locascio PF, Land ML, Larimer FW, et al. (2010) Prodigal: prokaryotic gene recognition and translation initiation site identification. *BMC Bioinformatics* 11: 119.
11. Edgar RC (2010) Search and clustering orders of magnitude faster than BLAST. *Bioinformatics* 26: 2460-2461.
12. Lagesen K, Hallin P, Rodland EA, Staerfeldt HH, Rognes T, et al. (2007) RNAmmer: consistent and rapid annotation of ribosomal RNA genes. *Nucleic Acids Res* 35: 3100-3108.
13. Quast C, Pruesse E, Yilmaz P, Gerken J, Schweer T, et al. (2013) The SILVA ribosomal RNA gene database project: improved data processing and web-based tools. *Nucleic Acids Res* 41: D590-596.
14. Nawrocki PE (2009) Structural RNA Homology Search and Alignment using Covariance Models. PhD thesis, Washington University in Saint Louis, School of Medicine.
15. Stamatakis A (2014) RAxML version 8: a tool for phylogenetic analysis and post-analysis of large phylogenies. *Bioinformatics*.
16. Hugenholtz P, Pitulle C, Hershberger KL, Pace NR (1998) Novel division level bacterial diversity in a Yellowstone hot spring. *J Bacteriol* 180: 366-376.
17. Wu M, Eisen JA (2008) A simple, fast, and accurate method of phylogenomic inference. *Genome Biol* 9: R151.

18. Janda JM, Abbott SL (2007) 16S rRNA gene sequencing for bacterial identification in the diagnostic laboratory: pluses, perils, and pitfalls. *J Clin Microbiol* 45: 2761-2764.
19. Ribeca P, Valiente G (2011) Computational challenges of sequence classification in microbiomic data. *Brief Bioinform* 12: 614-625.
20. Vandamme P, Pot B, Gillis M, de Vos P, Kersters K, et al. (1996) Polyphasic taxonomy, a consensus approach to bacterial systematics. *Microbiol Rev* 60: 407-438.
